# Supplementary material for: Efficient synthesis of highly soluble and functionalized fulleropyrrolidines
Source: Royal Society of Chemistry journal article supplement (doi:10.1039/c4ra15057k), 2015-01-01
Supplement: c4ra15057k1.pdf [file c4ra15057k1.pdf]

## Supporting Information

# Efficient synthesis of highly soluble and functionalized fulleropyrrolidines

Abdulrazack Parveen<sup>a</sup>, Venkatesan Suganya<sup>a</sup> and Samuthira Nagarajan<sup>b\*</sup>

<sup>a</sup>Department of Chemistry, Annamalai University, Annamalainagar 608 002, Tamil Nadu, India.

<sup>b</sup>Department of Chemistry, Central University of Tamil Nadu, Thiruvarur 601101, Tamil Nadu, India.

---

## CONTENTS

---

|                                                                                                     |          |
|-----------------------------------------------------------------------------------------------------|----------|
| 2,4-bis(n-hexadecyloxy)benzaldehyde ( <b>3a</b> ) (IR)                                              | -----S1  |
| 2,4-bis(n-hexadecyloxy)benzaldehyde ( <b>3a</b> ) ( <sup>1</sup> H NMR)                             | -----S2  |
| 2,4-bis(n-hexadecyloxy)benzaldehyde ( <b>3a</b> ) ( <sup>13</sup> C NMR)                            | -----S3  |
| 3,4-Bis(n-decyloxy)benzaldehyde ( <b>3b</b> ) (IR)                                                  | -----S4  |
| 3,4-Bis(n-decyloxy)benzaldehyde ( <b>3b</b> ) ( <sup>1</sup> H NMR)                                 | -----S5  |
| 3,4-Bis(n-decyloxy)benzaldehyde ( <b>3b</b> ) ( <sup>13</sup> C NMR)                                | -----S6  |
| 3,4-Bis(n-octadecyloxy)benzaldehyde ( <b>3c</b> ) (IR)                                              | -----S7  |
| 3,4-Bis(n-octadecyloxy)benzaldehyde ( <b>3c</b> ) ( <sup>1</sup> H NMR)                             | -----S8  |
| 3,4-Bis(n-octadecyloxy)benzaldehyde ( <b>3c</b> ) ( <sup>13</sup> C NMR)                            | -----S9  |
| 2,3,4-Tris(n-heptyloxy)benzaldehyde ( <b>3d</b> ) (IR)                                              | -----S10 |
| 2,3,4-Tris(n-heptyloxy)benzaldehyde ( <b>3d</b> ) ( <sup>1</sup> H NMR)                             | -----S11 |
| 2,3,4-Tris(n-heptyloxy)benzaldehyde ( <b>3d</b> ) ( <sup>13</sup> C NMR)                            | -----S12 |
| 4-Decyloxybenzaldehyde ( <b>3e</b> ) (IR)                                                           | -----S13 |
| 4-Decyloxybenzaldehyde ( <b>3e</b> ) ( <sup>1</sup> H NMR)                                          | -----S14 |
| 4-Decyloxybenzaldehyde ( <b>3e</b> ) ( <sup>13</sup> C NMR)                                         | -----S15 |
| 4-Octadecyloxybenzaldehyde ( <b>3f</b> ) (IR)                                                       | -----S16 |
| 4-Octadecyloxybenzaldehyde ( <b>3f</b> ) ( <sup>1</sup> H NMR)                                      | -----S17 |
| 4-Octadecyloxybenzaldehyde ( <b>3f</b> ) ( <sup>13</sup> C NMR)                                     | -----S18 |
| 3-Methoxy-4-octadecyloxybenzaldehyde ( <b>3g</b> ) (IR)                                             | -----S19 |
| 3-Methoxy-4-octadecyloxybenzaldehyde ( <b>3g</b> ) ( <sup>1</sup> H NMR)                            | -----S20 |
| 3-Methoxy-4-octadecyloxybenzaldehyde ( <b>3g</b> ) ( <sup>13</sup> C NMR)                           | -----S21 |
| N-methyl-2-(2,4-bis(n-hexadecyloxy)phenyl)fulleropyrrolidine ( <b>4a</b> ) (IR)                     | -----S22 |
| N-methyl-2-(2,4-bis(n-hexadecyloxy)phenyl)fulleropyrrolidine ( <b>4a</b> ) ( <sup>1</sup> H NMR)    | -----S23 |
| N-methyl-2-(2,4-bis(n-hexadecyloxy)phenyl)fulleropyrrolidine ( <b>4a</b> ) ( <sup>13</sup> C NMR)   | -----S24 |
| N-Methyl-2-(3,4-bis(n-decyloxy)phenyl)fulleropyrrolidine ( <b>4b</b> ) (IR)                         | -----S25 |
| N-Methyl-2-(3,4-bis(n-decyloxy)phenyl)fulleropyrrolidine ( <b>4b</b> ) ( <sup>1</sup> H NMR)        | -----S26 |
| N-Methyl-2-(3,4-bis(n-decyloxy)phenyl)fulleropyrrolidine ( <b>4b</b> ) ( <sup>13</sup> C NMR)       | -----S27 |
| N-Methyl-2-(3,4-bis(n-octadecyloxy)phenyl)fulleropyrrolidine ( <b>4c</b> ) (IR)                     | -----S28 |
| N-Methyl-2-(3,4-bis(n-octadecyloxy)phenyl)fulleropyrrolidine ( <b>4c</b> ) ( <sup>1</sup> H NMR)    | -----S29 |
| N-Methyl-2-(3,4-bis(n-octadecyloxy)phenyl)fulleropyrrolidine ( <b>4c</b> ) ( <sup>13</sup> C NMR)   | -----S30 |
| N-Methyl-2-((2,3,4-tris(n-heptyloxy))phenyl)fulleropyrrolidine ( <b>4d</b> ) (IR)                   | -----S31 |
| N-Methyl-2-((2,3,4-tris(n-heptyloxy))phenyl)fulleropyrrolidine ( <b>4d</b> ) ( <sup>1</sup> H NMR)  | -----S32 |
| N-Methyl-2-((2,3,4-tris(n-heptyloxy))phenyl)fulleropyrrolidine ( <b>4d</b> ) ( <sup>13</sup> C NMR) | -----S33 |
| N-Methyl-2-((4-decyloxy)phenyl)fulleropyrrolidine ( <b>4e</b> ) (IR)                                | -----S34 |
| N-Methyl-2-((4-decyloxy)phenyl)fulleropyrrolidine ( <b>4e</b> ) ( <sup>1</sup> H NMR)               | -----S35 |
| N-Methyl-2-((4-decyloxy)phenyl)fulleropyrrolidine ( <b>4e</b> ) ( <sup>13</sup> C NMR)              | -----S36 |

## Supporting Information

|                                                                                                      |          |
|------------------------------------------------------------------------------------------------------|----------|
| N-Methyl-2-((4-octadecyloxy)phenyl)fulleropyrrolidine ( <b>4f</b> ) (IR)                             | -----S37 |
| N-Methyl-2-((4-octadecyloxy)phenyl)fulleropyrrolidine ( <b>4f</b> ) ( <sup>1</sup> H NMR)            | -----S38 |
| N-Methyl-2-((4-octadecyloxy)phenyl)fulleropyrrolidine ( <b>4f</b> ) ( <sup>13</sup> C NMR)           | -----S39 |
|                                                                                                      |          |
| N-Methyl-2-((3-methoxy-4-octadecyloxy)phenyl)fulleropyrrolidine ( <b>4g</b> ) (IR)                   | -----S40 |
| N-Methyl-2-((3-methoxy-4-octadecyloxy)phenyl)fulleropyrrolidine ( <b>4g</b> ) ( <sup>1</sup> H NMR)  | -----S41 |
| N-Methyl-2-((3-methoxy-4-octadecyloxy)phenyl)fulleropyrrolidine ( <b>4g</b> ) ( <sup>13</sup> C NMR) | -----S42 |
| N-Methyl-2-((2,4,6-trimethyl)phenyl)fulleropyrrolidine ( <b>4h</b> ) (IR)                            | -----S43 |
| N-Methyl-2-((2,4,6-trimethyl)phenyl)fulleropyrrolidine ( <b>4h</b> ) ( <sup>1</sup> H NMR)           | -----S44 |
| N-Methyl-2-((2,4,6-trimethyl)phenyl)fulleropyrrolidine ( <b>4h</b> ) ( <sup>13</sup> C NMR)          | -----S45 |
| N-Methyl-2-((4-tert-butyl)phenyl)fulleropyrrolidine ( <b>4i</b> ) (IR)                               | -----S46 |
| N-Methyl-2-((4-tert-butyl)phenyl)fulleropyrrolidine ( <b>4i</b> ) ( <sup>1</sup> H NMR)              | -----S47 |
| N-Methyl-2-((4-tert-butyl)phenyl)fulleropyrrolidine ( <b>4i</b> ) ( <sup>13</sup> C NMR)             | -----S48 |
| N-Methyl-2-(3,4-bis(n-octadecyloxy)phenyl)fulleropyrrolidine ( <b>4c</b> ) (Mass)                    | -----S49 |
| N-Methyl-2-((2,3,4-tris(n-heptyloxy))phenyl)fulleropyrrolidine ( <b>4d</b> ) (Mass)                  | -----S50 |
| N-Methyl-2-((3-methoxy-4-octadecyloxy)phenyl)fulleropyrrolidine ( <b>4g</b> ) (Mass)                 | -----S51 |
| N-Methyl-2-((2,4,6-trimethyl)phenyl)fulleropyrrolidine ( <b>4h</b> ) (Mass)                          | -----S52 |

# Supporting Information

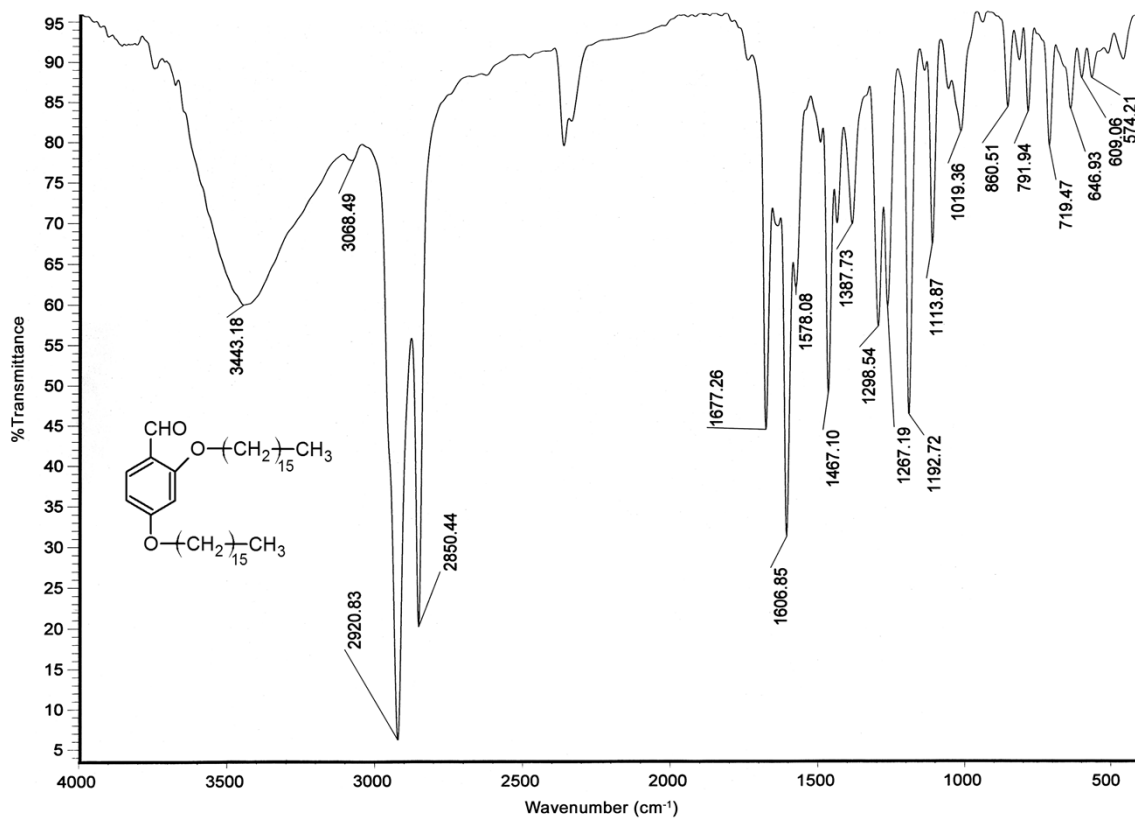

Fig. S1. FT-IR spectrum of 3a.

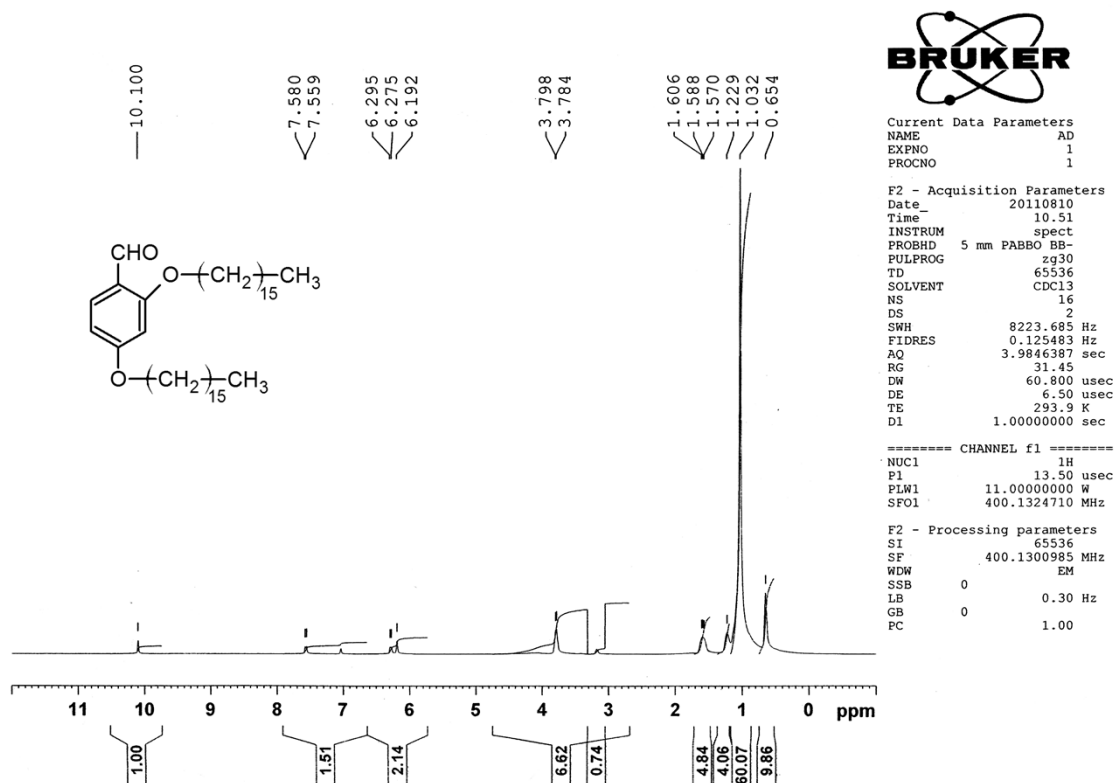

Fig. S2. <sup>1</sup>H NMR spectrum of 3a.

# Supporting Information

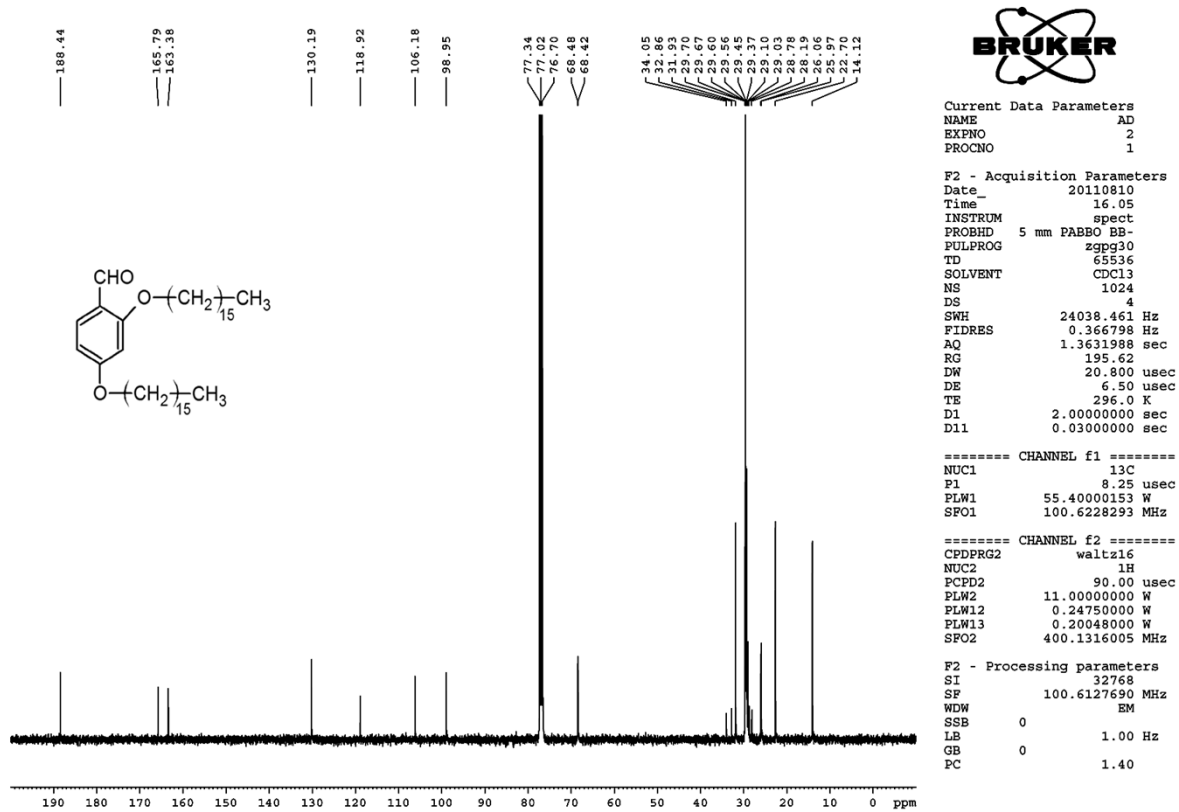

Fig. S3. <sup>13</sup>C NMR spectrum of 3a.

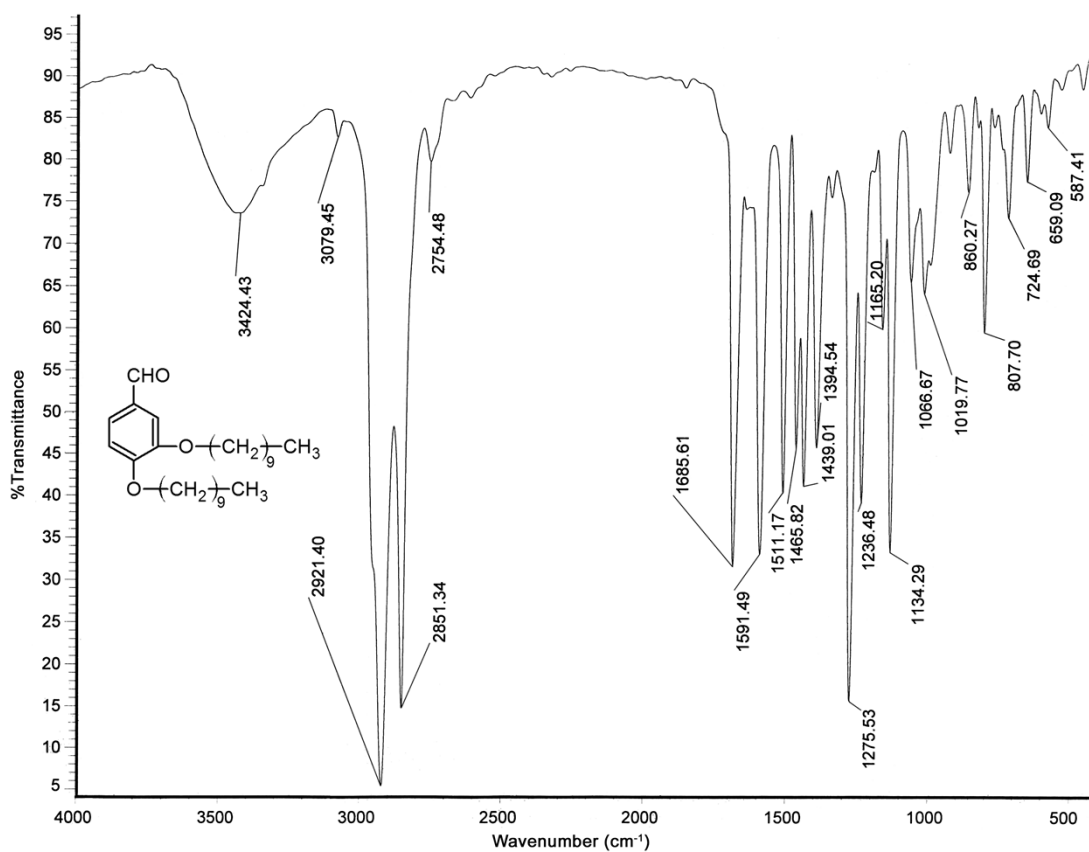



Fig. S4. FT-IR spectrum of 3b.

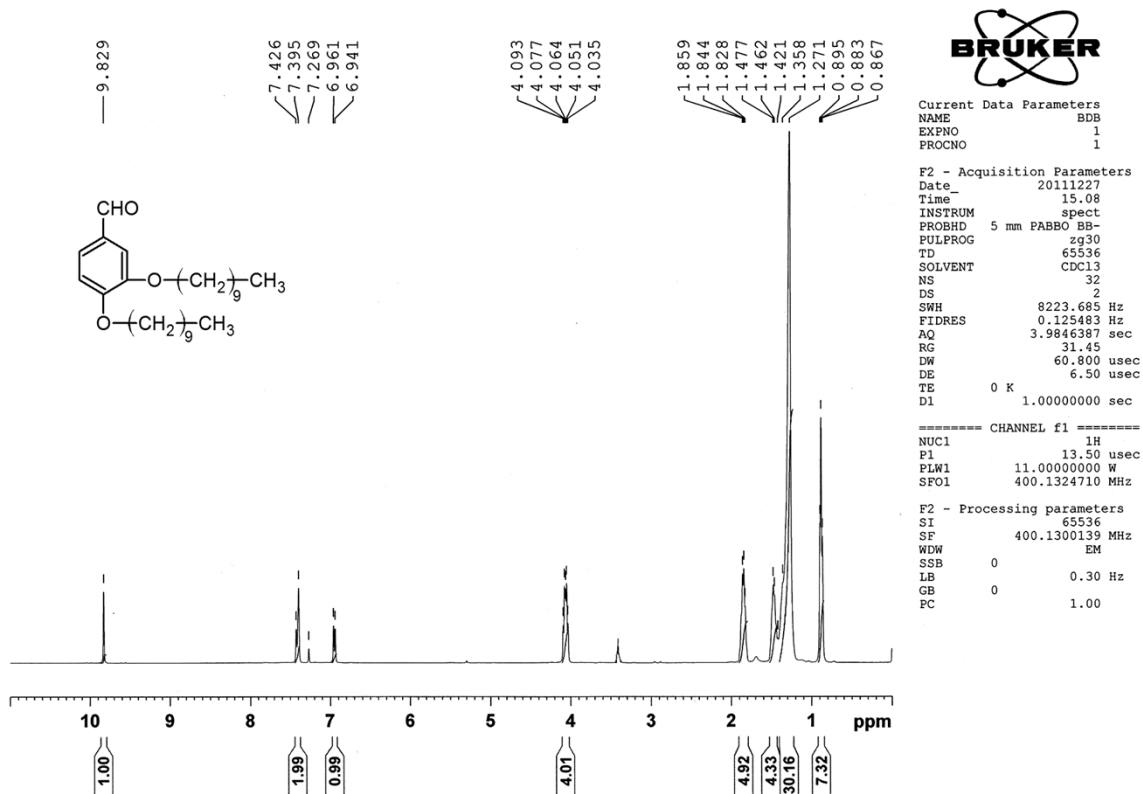Fig. S5. <sup>1</sup>H NMR spectrum of 3b.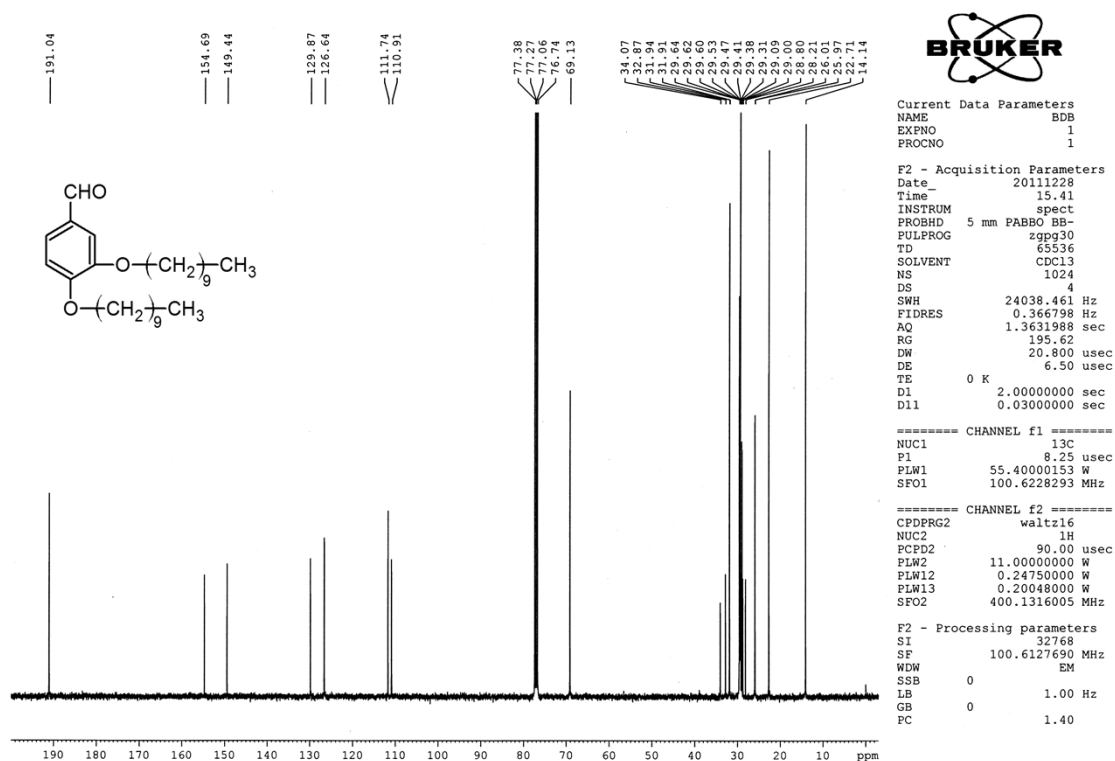Fig. S6. <sup>13</sup>C NMR spectrum of 3b.

# Supporting Information

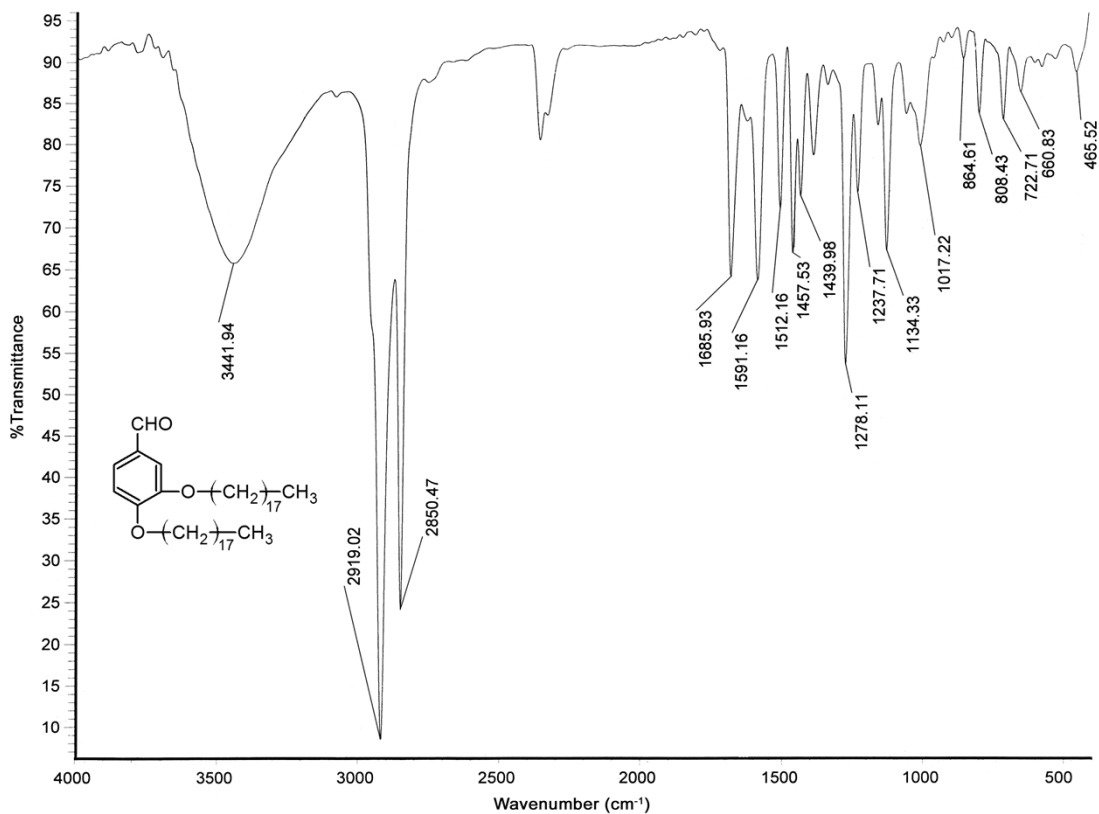

Fig. S7. FT-IR spectrum of **3c**.

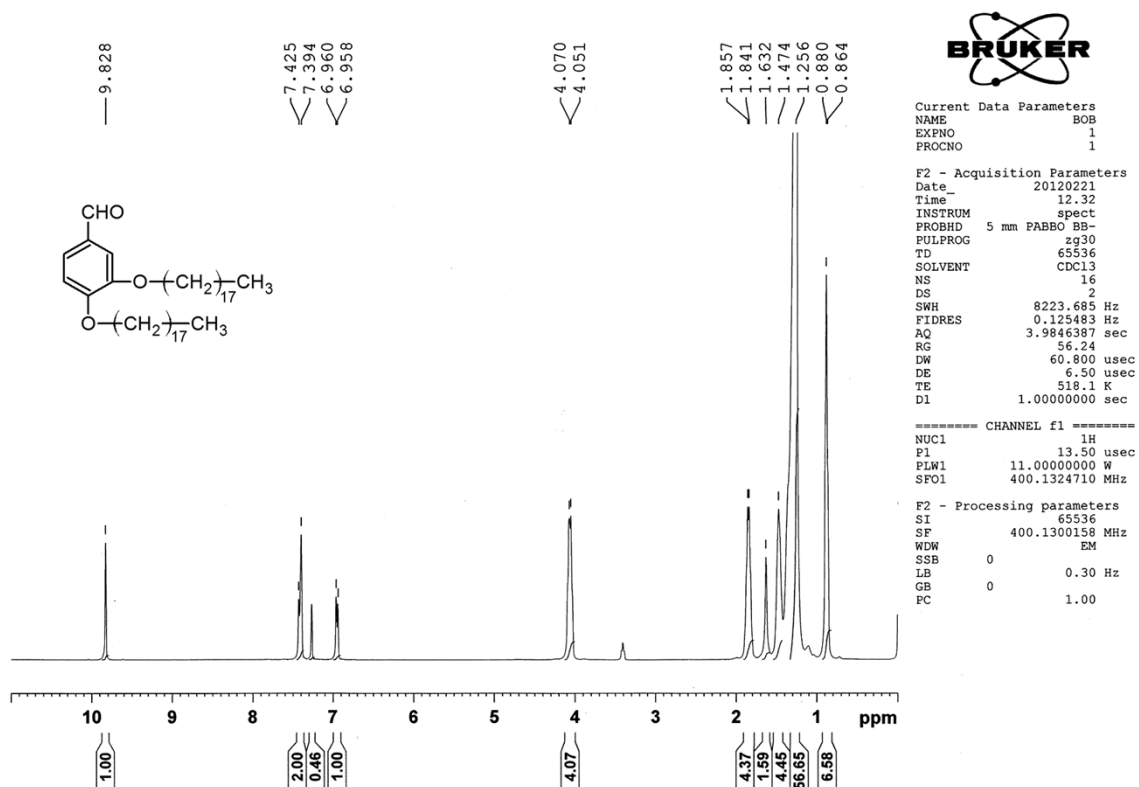

Fig. S8. <sup>1</sup>H NMR spectrum of **3c**.

# Supporting Information

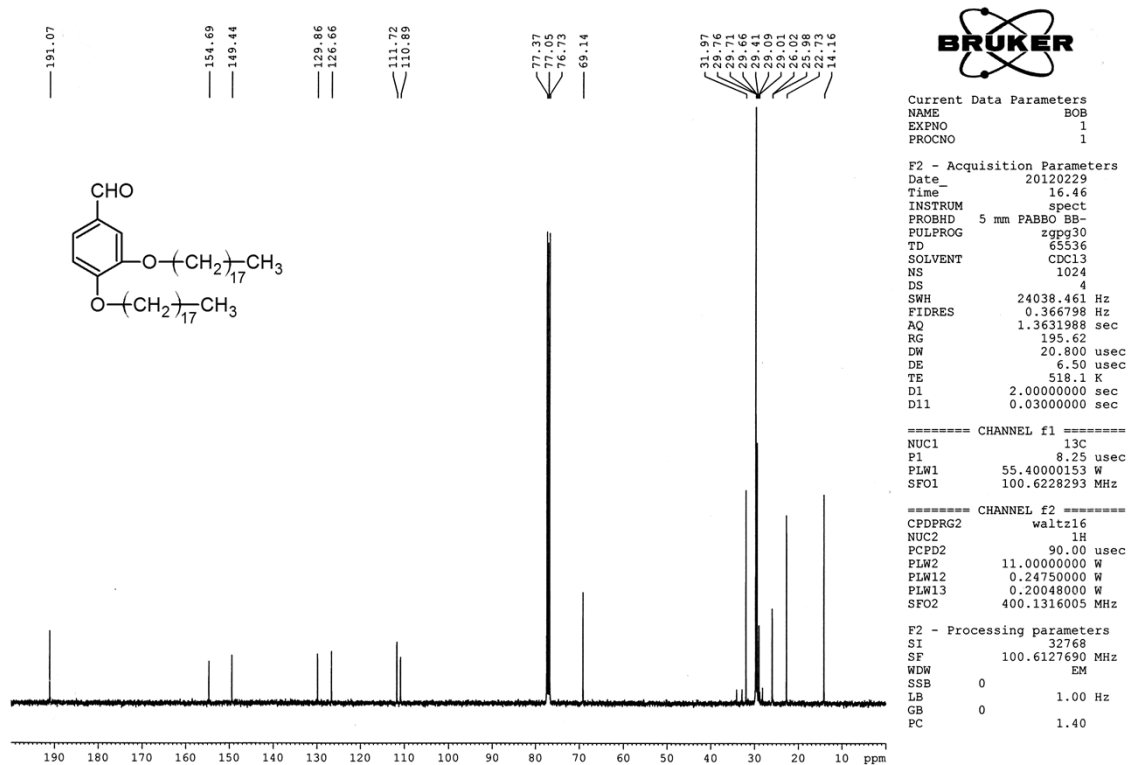

Fig. S9. <sup>13</sup>C NMR spectrum of 3c.

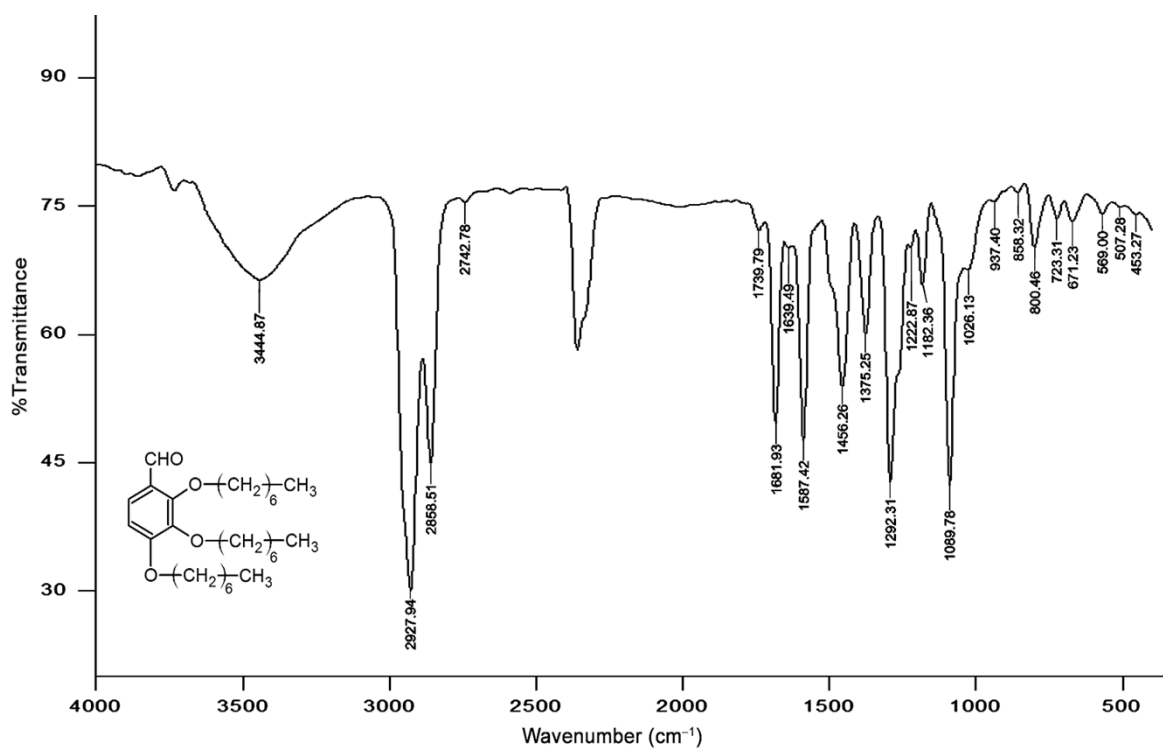

Fig. S10. FT-IR spectrum of 3d.

# Supporting Information

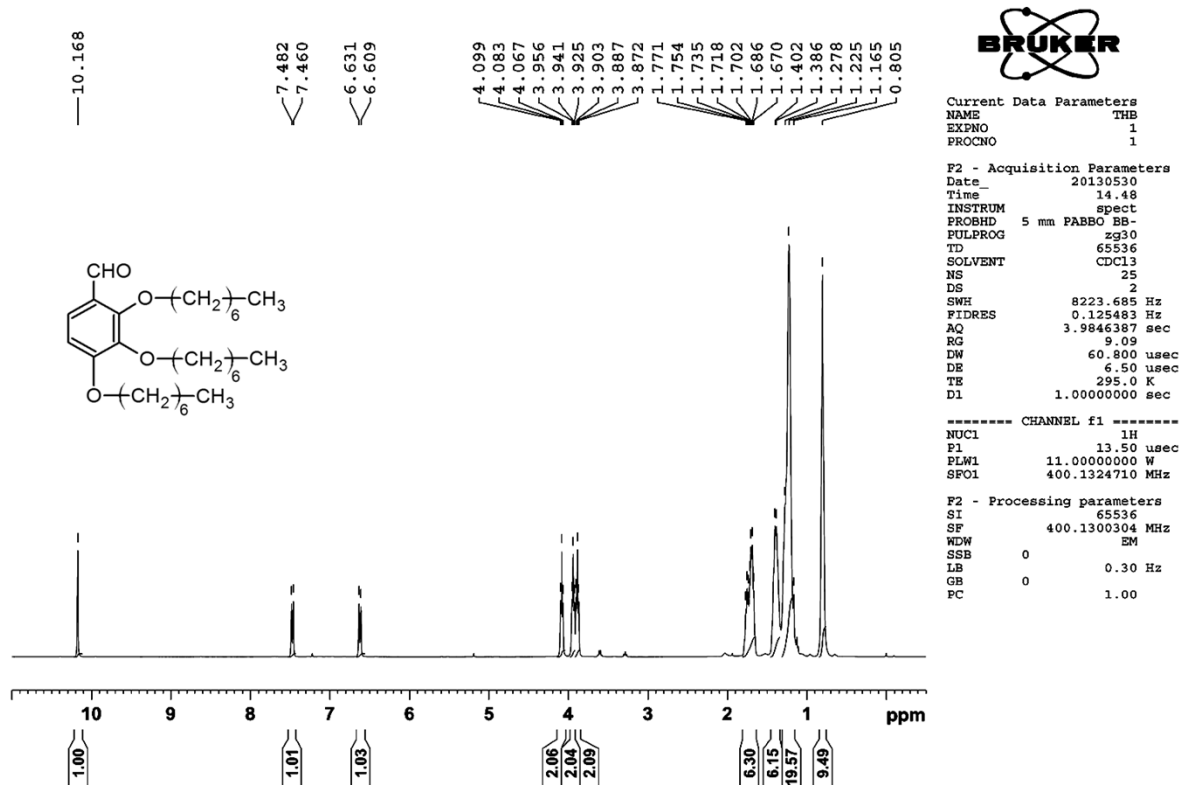

Fig. S11. <sup>1</sup>H NMR spectrum of 3d.

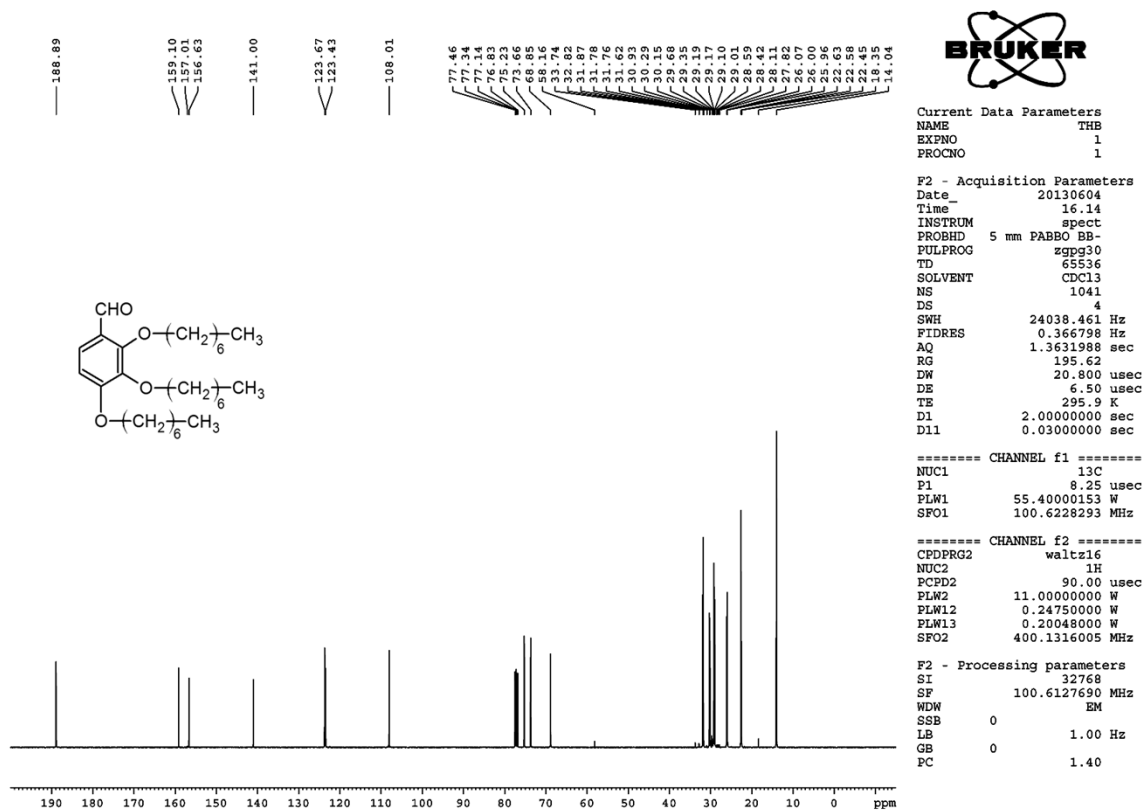

Fig. S12. <sup>13</sup>C NMR spectrum of 3d.

# Supporting Information

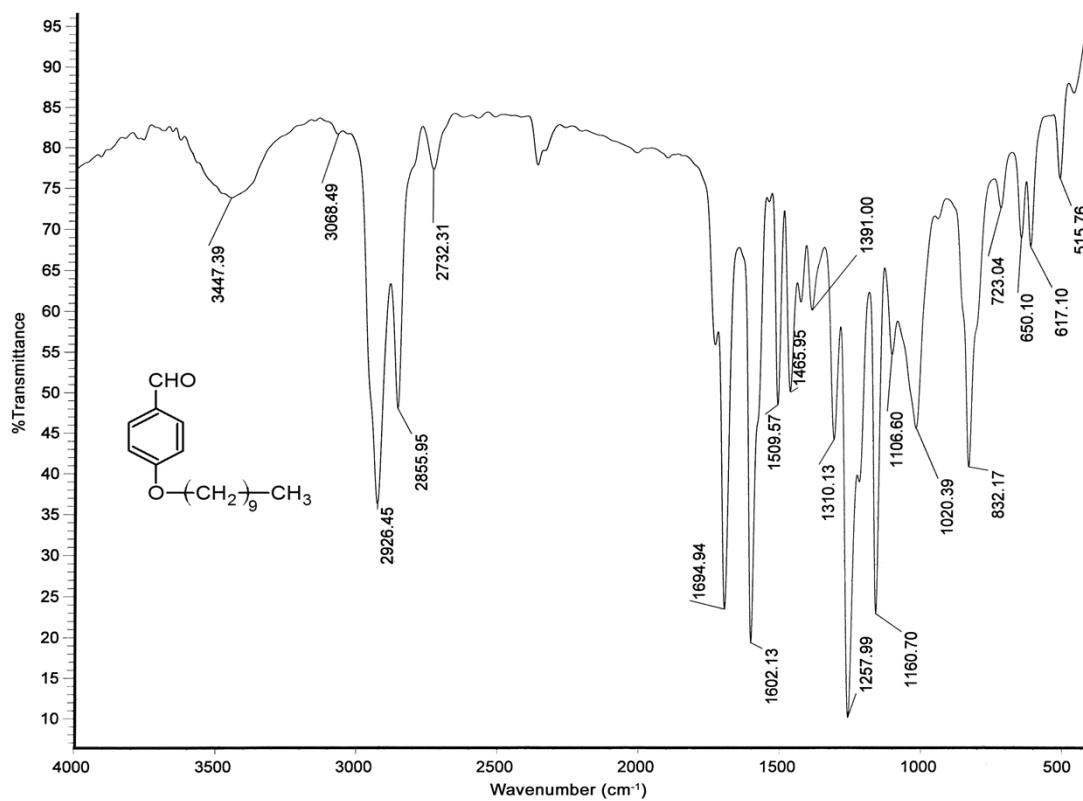

Fig. S13. FT-IR spectrum of 3e.

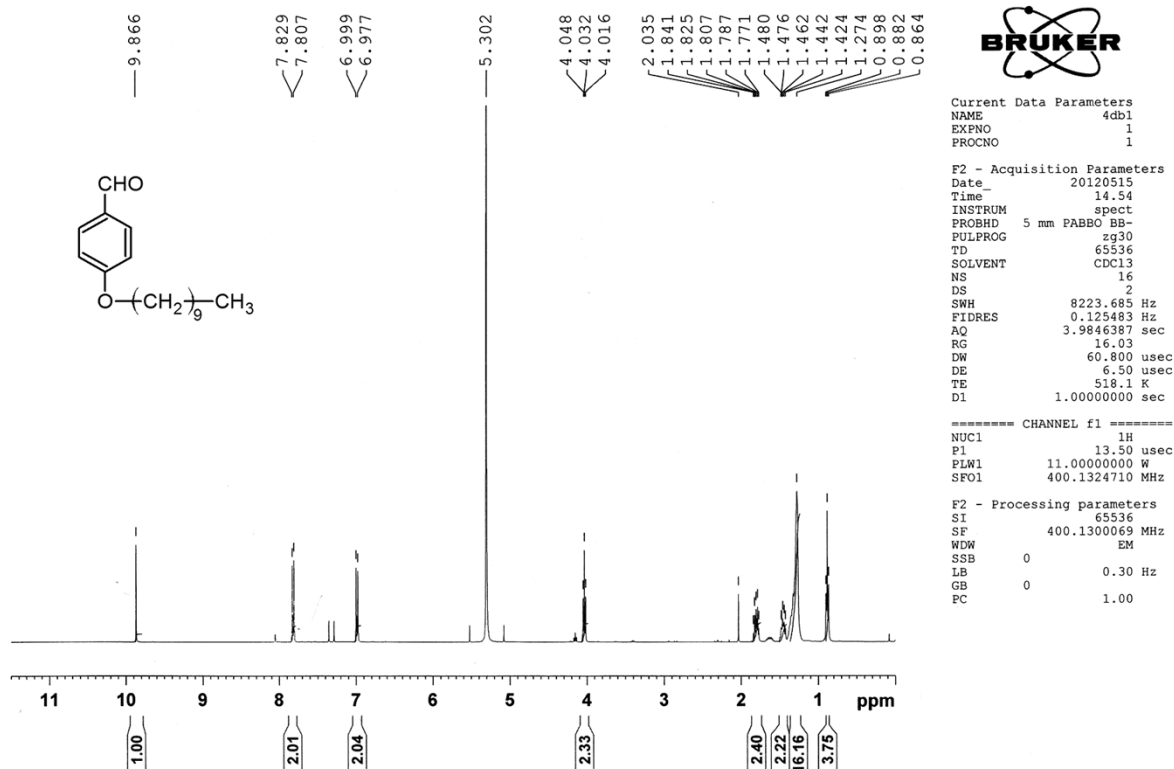

Fig. S14. <sup>1</sup>H NMR spectrum of 3e.

# Supporting Information

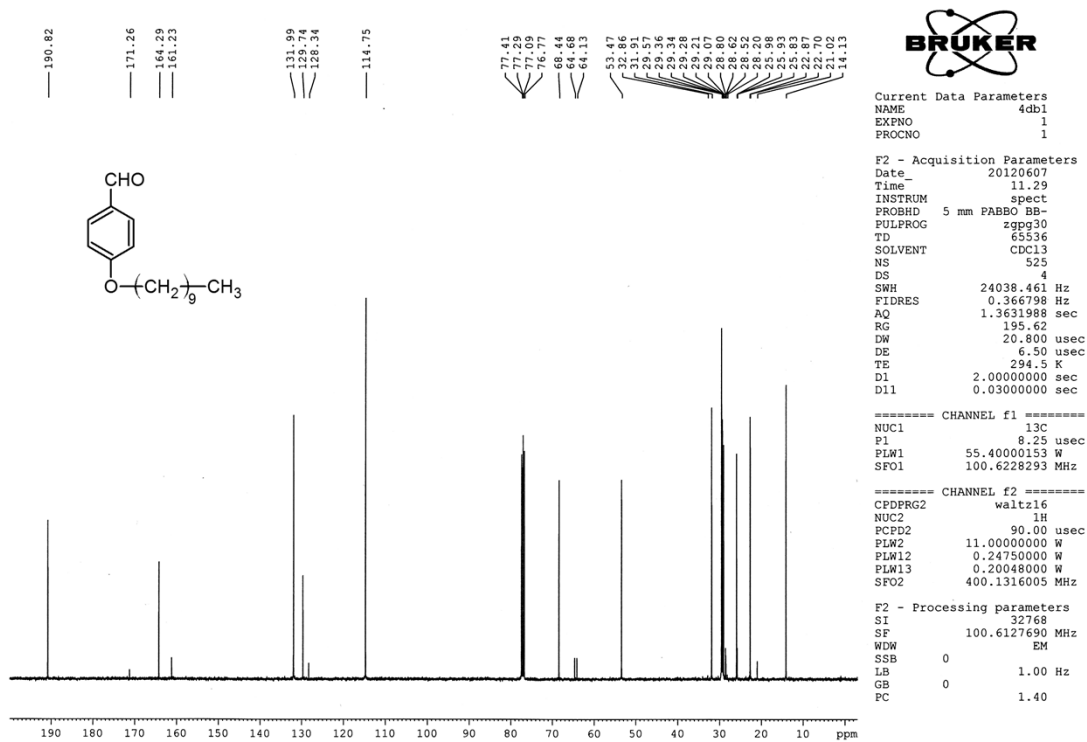

Fig. S15. <sup>13</sup>C NMR spectrum of 3e.

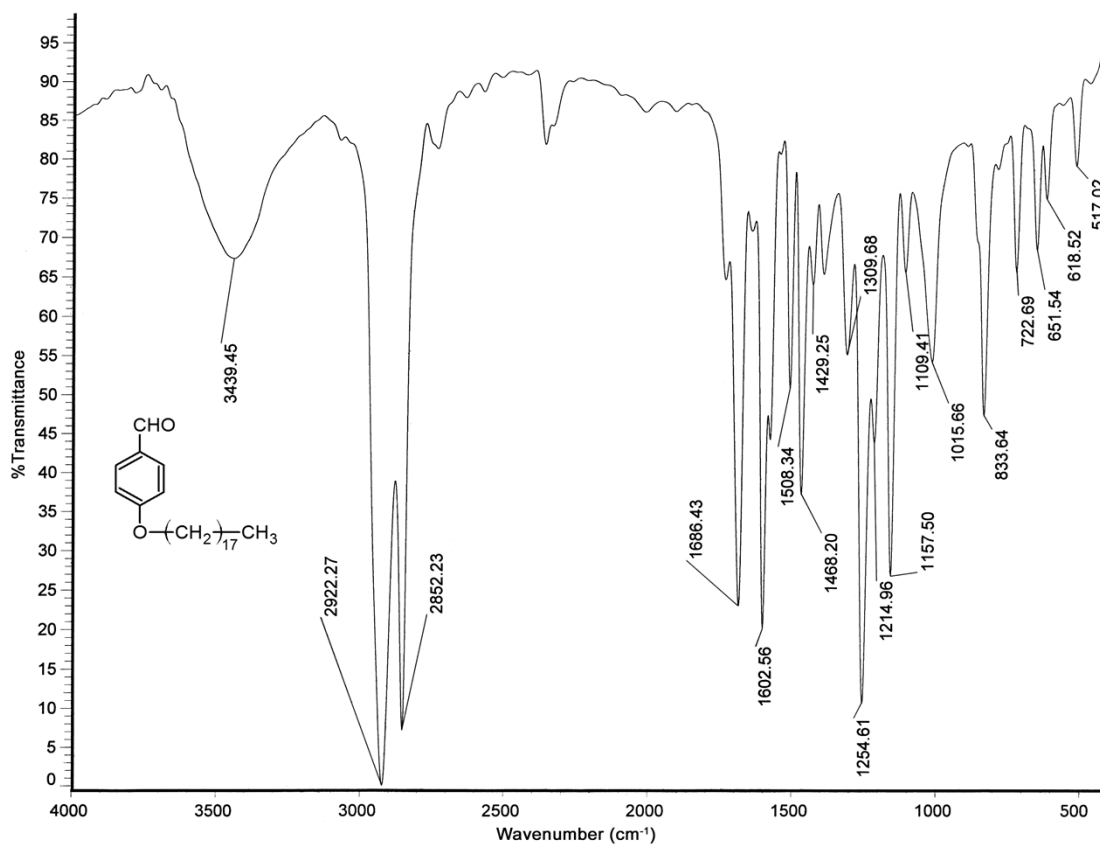

Fig. S16. FT-IR spectrum of 3f.

# Supporting Information

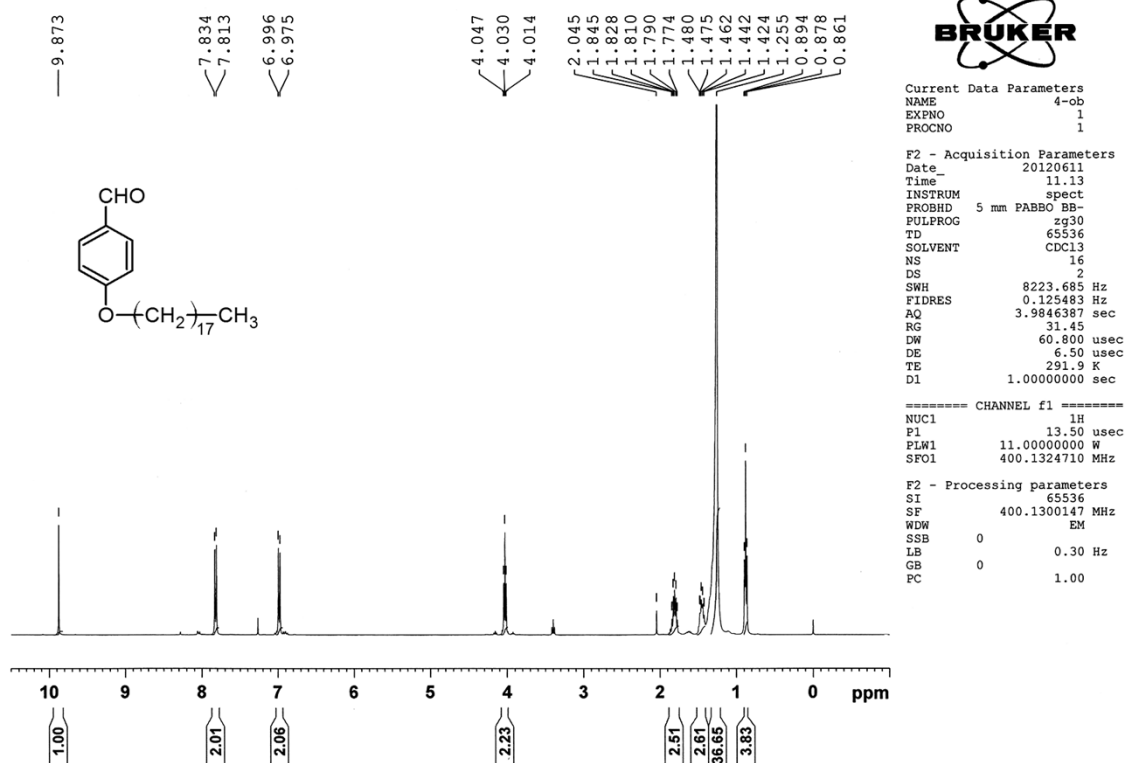

Fig. S17. <sup>1</sup>H NMR spectrum of 3f.

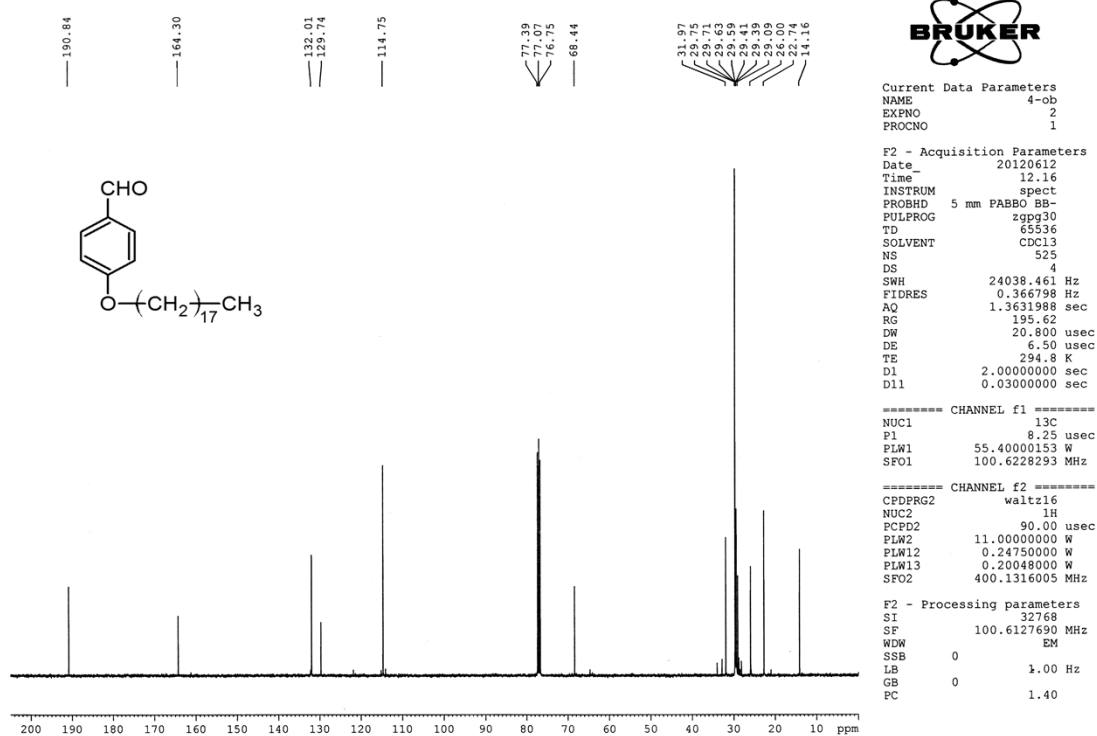

Fig. S18. <sup>13</sup>C NMR spectrum of 3f.

# Supporting Information

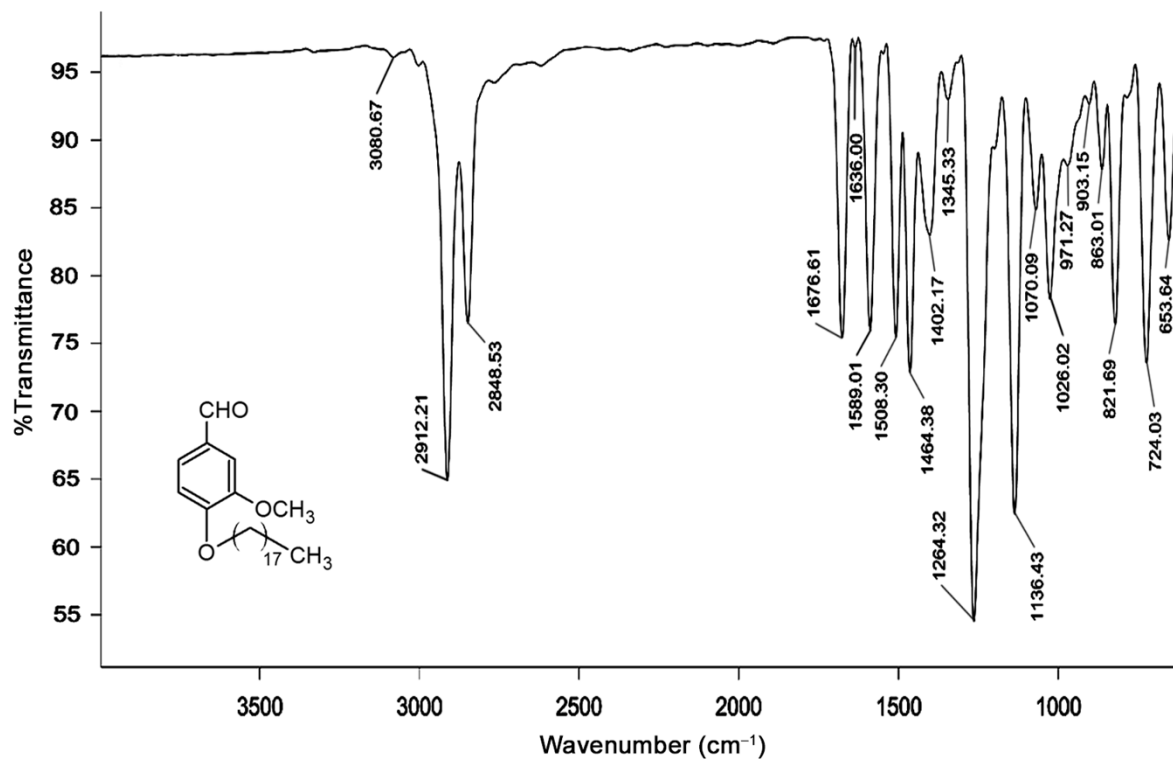

Fig. S19. FT-IR spectrum of **3g**.

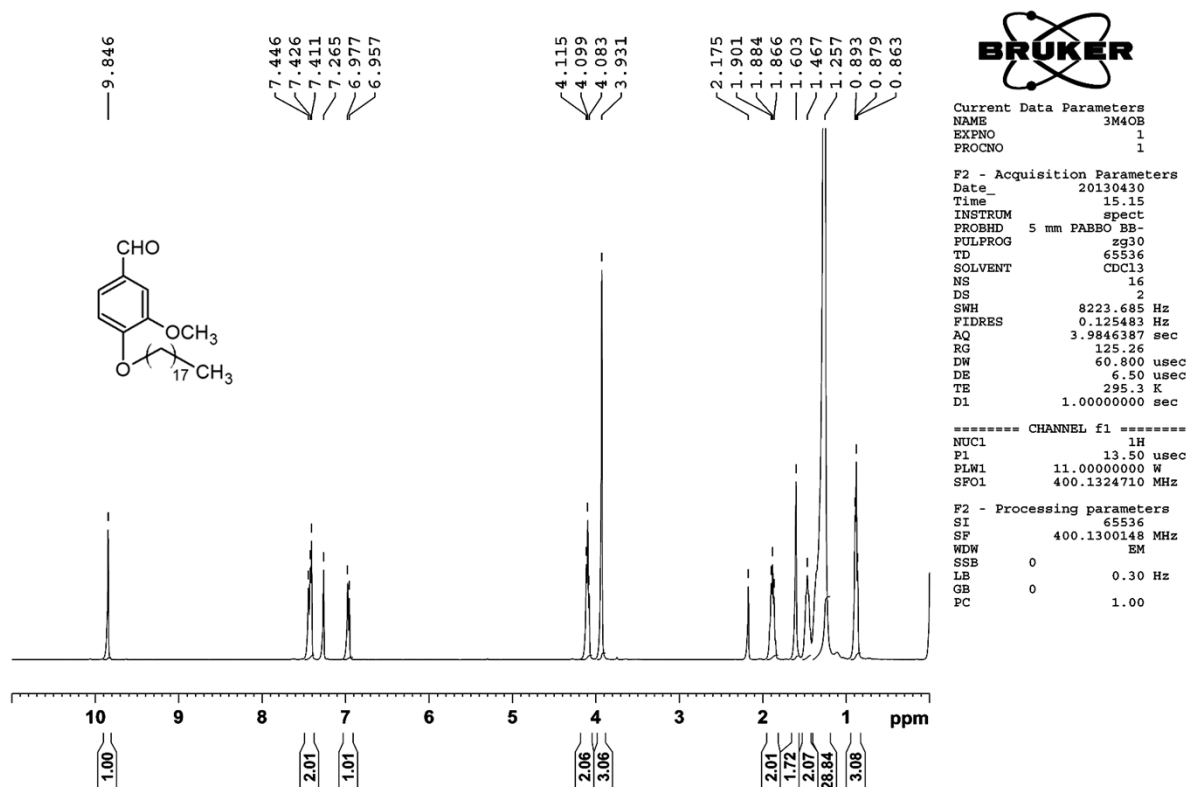

Fig. S20. <sup>1</sup>H NMR spectrum of **3g**.



# Supporting Information

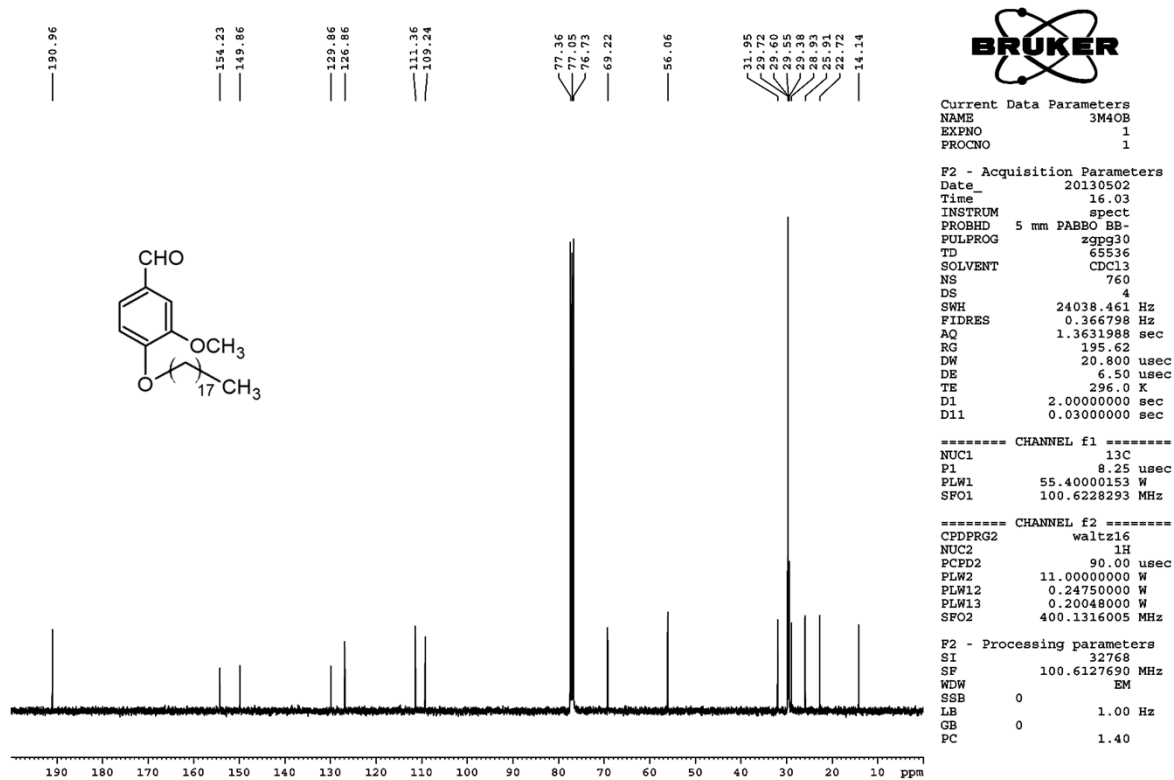

Fig. S21. <sup>13</sup>C NMR spectrum of **3g**.

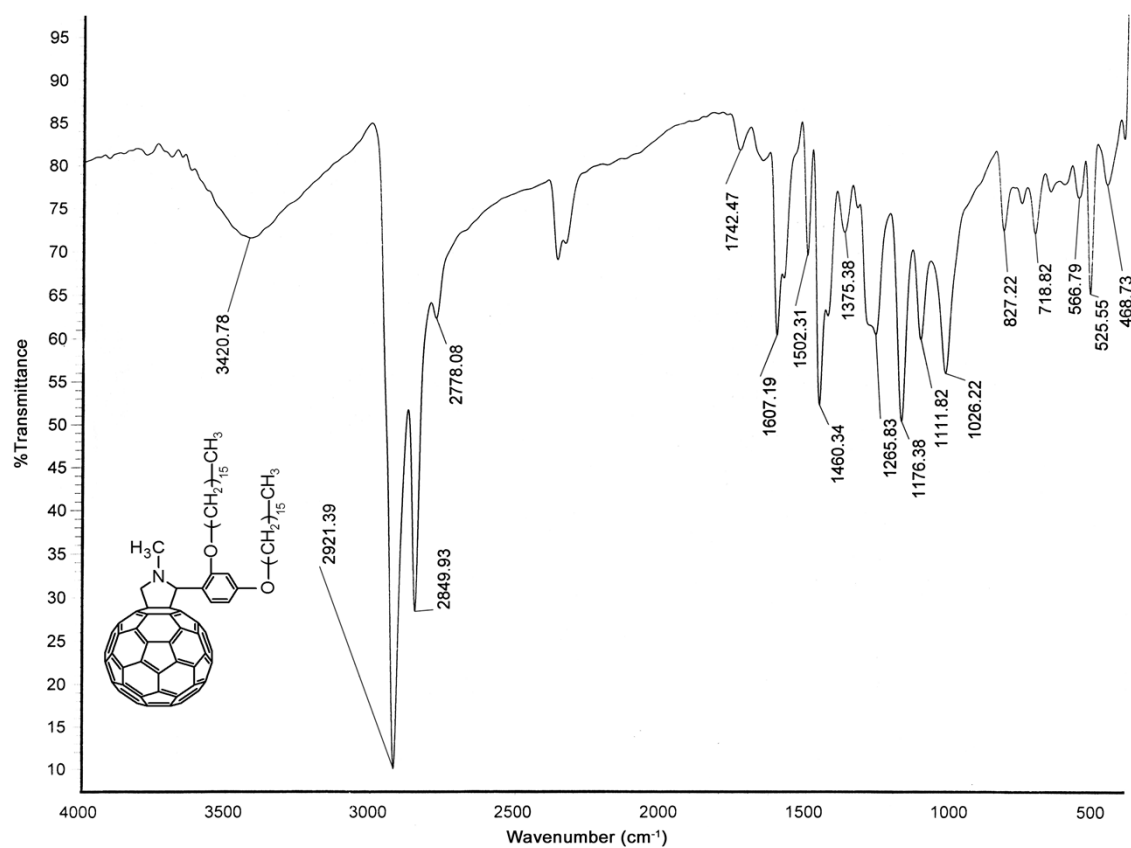

Fig. S22. FT-IR spectrum of 4a.

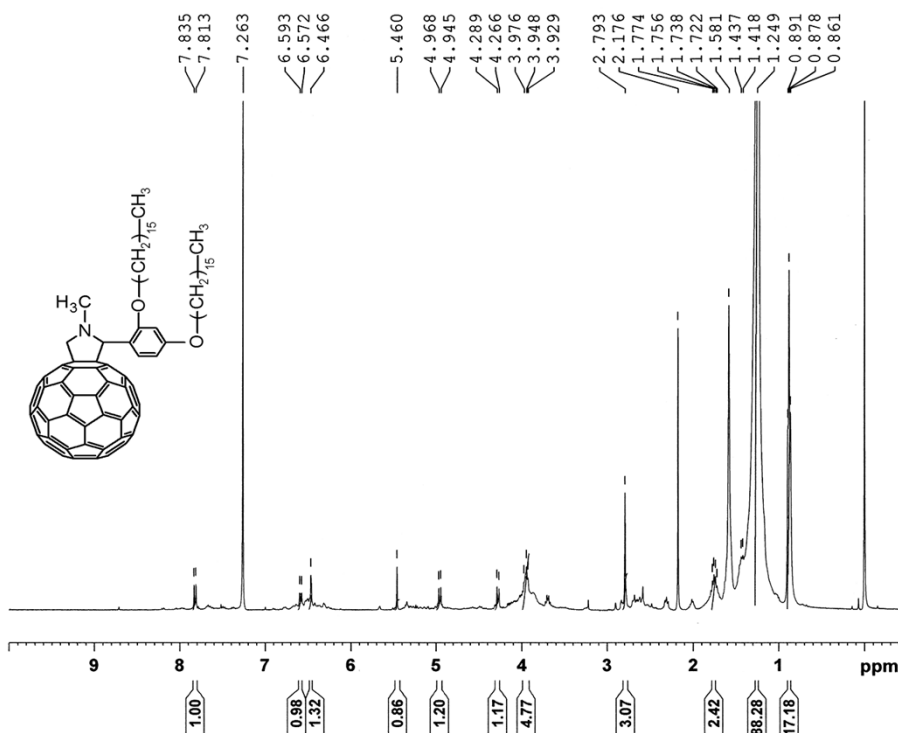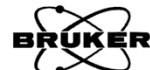

Current Data Parameters  
 NAME NFP-1  
 EXPNO 2  
 PROCNO 1

F2 - Acquisition Parameters  
 Date\_ 20111010  
 Time\_ 12.44  
 INSTRUM spect  
 PROBHD 5 mm PABBO BB-  
 PULPROG zg30  
 TD 65536  
 SOLVENT CDCl3  
 NS 34  
 DS 2  
 SWH 8223.685 Hz  
 FIDRES 0.125483 Hz  
 AQ 3.9846387 sec  
 RG 155.51  
 DW 60.800 usec  
 DE 6.50 usec  
 TE 0 K  
 D1 1.00000000 sec

===== CHANNEL f1 =====  
 NUC1 1H  
 P1 13.50 usec  
 PLW1 11.0000000 W  
 SF01 400.1324710 MHz

F2 - Processing parameters  
 SI 65536  
 SF 400.1300167 MHz  
 WDW EM  
 SSB 0  
 LB 0.30 Hz  
 GB 0  
 FC 1.00

Fig. S23. <sup>1</sup>H NMR spectrum of 4a.

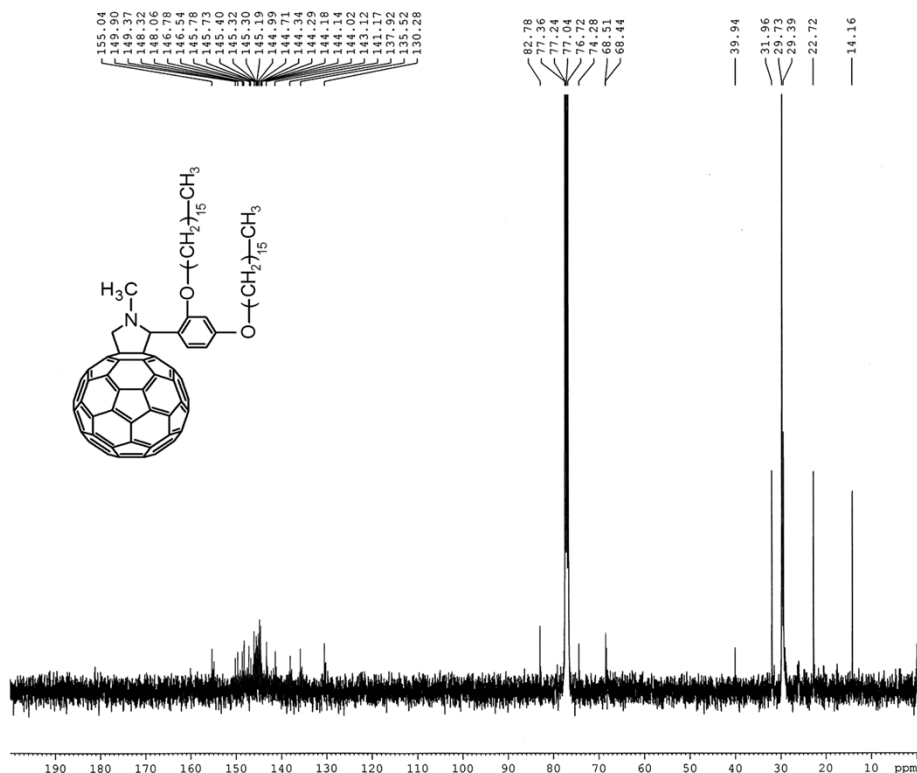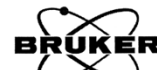

Current Data Parameters  
 NAME NFP-new  
 EXPNO 1  
 PROCNO 1

F2 - Acquisition Parameters  
 Date\_ 20130226  
 Time\_ 21.54  
 INSTRUM spect  
 PROBHD 5 mm PABBO BB-  
 PULPROG zgpg30  
 TD 65536  
 SOLVENT CDCl3  
 NS 6000  
 DS 4  
 SWH 24038.461 Hz  
 FIDRES 0.366798 Hz  
 AQ 1.3631988 sec  
 RG 195.62  
 DW 20.800 usec  
 DE 6.50 usec  
 TE 294.9 K  
 D1 2.00000000 sec  
 D11 0.03000000 sec

===== CHANNEL f1 =====  
 NUC1 13C  
 P1 8.25 usec  
 PLW1 55.40000153 W  
 SF01 100.6228293 MHz

===== CHANNEL f2 =====  
 CPDPRG2 waltz16  
 NUC2 1H  
 PCPD2 90.00 usec  
 PLW2 11.00000000 W  
 PLW12 0.24750000 W  
 PLW13 0.20048000 W  
 SF02 400.1316005 MHz

F2 - Processing parameters  
 SI 32768  
 SF 100.6127690 MHz  
 WDW EM  
 SSB 0  
 LB 1.00 Hz  
 GB 0  
 FC 1.40

# Supporting Information

**Fig. S24.**  $^{13}\text{C}$  NMR spectrum of **4a**.

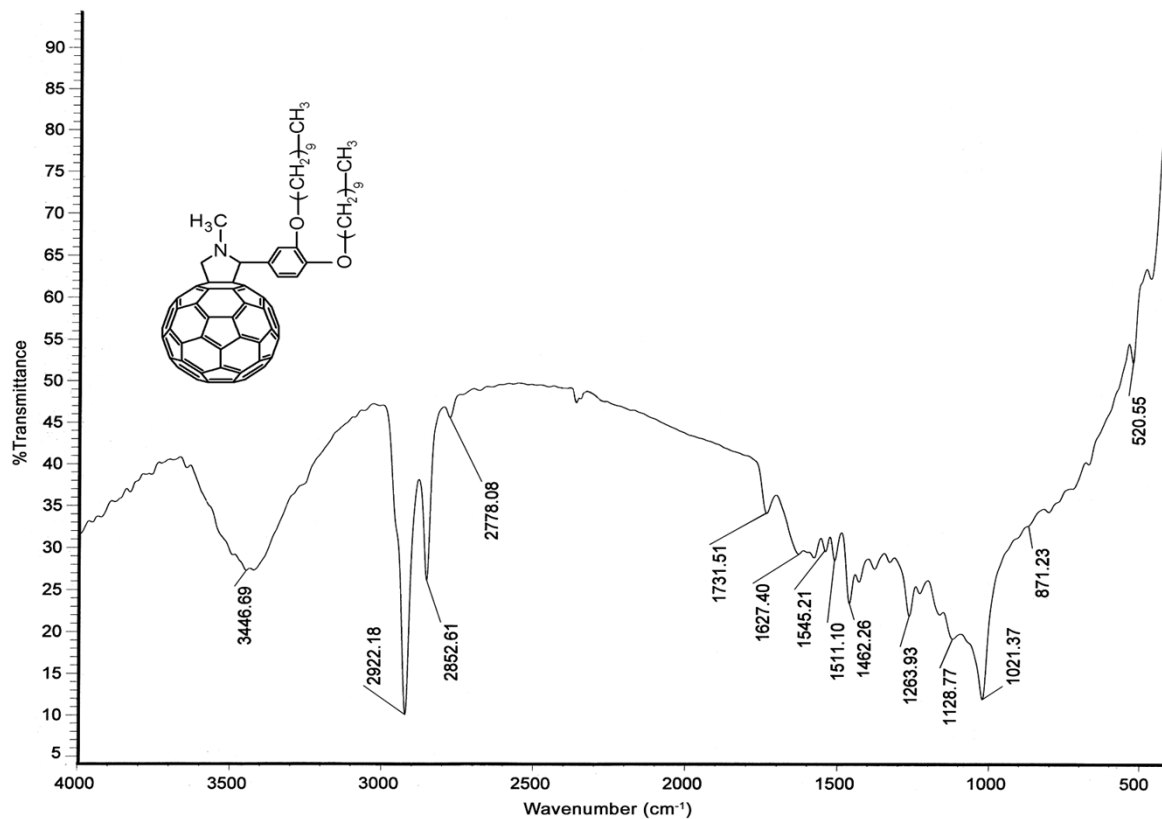

**Fig. S25.** FT-IR spectrum of **4b**.

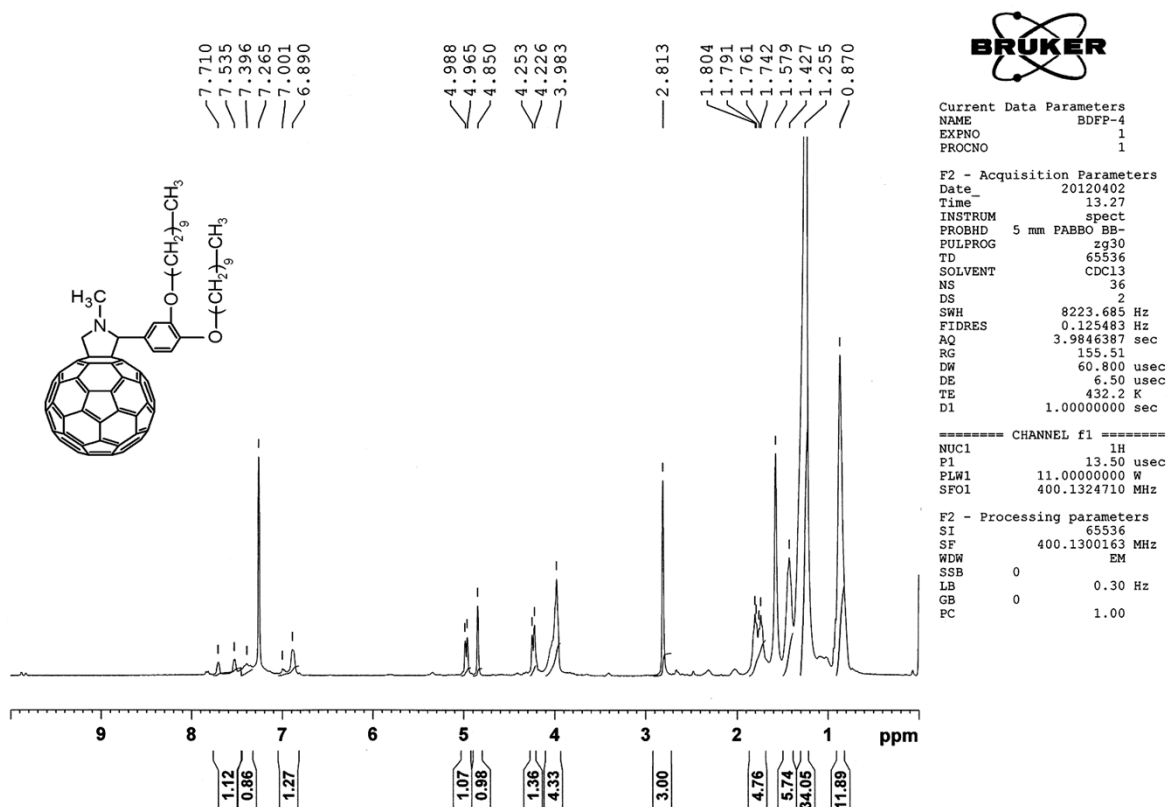

# Supporting Information

Fig. S26. <sup>1</sup>H NMR spectrum of 4b.

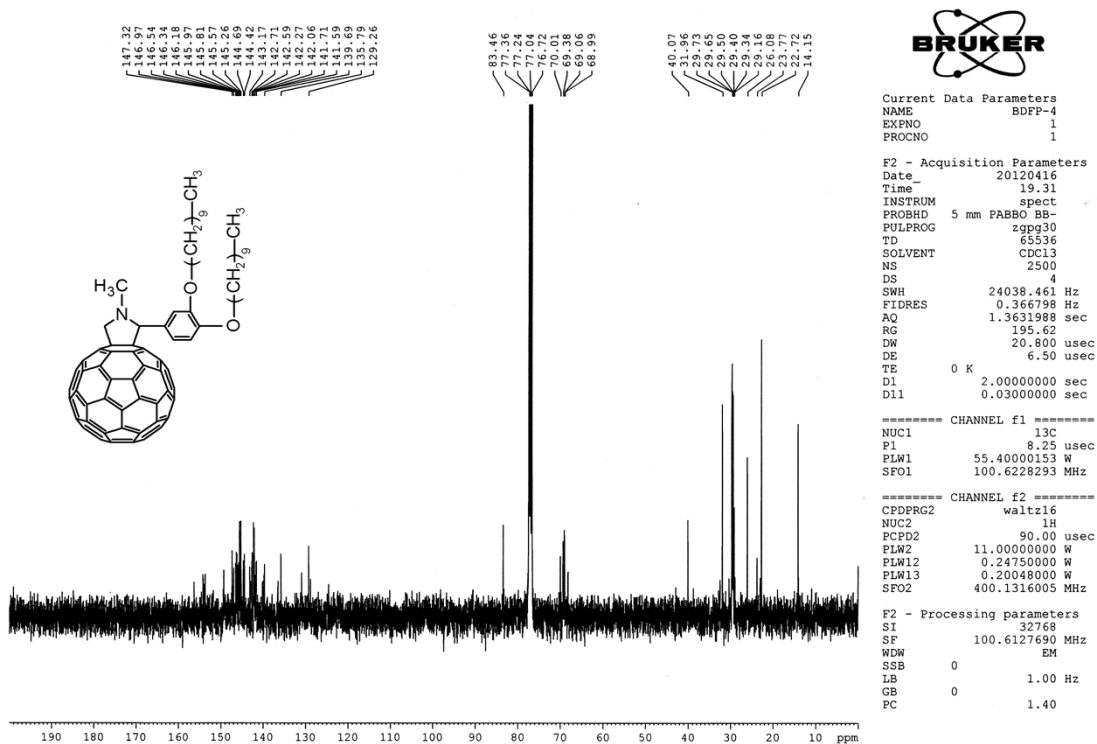

Fig. S27. <sup>13</sup>C NMR spectrum of 4b.

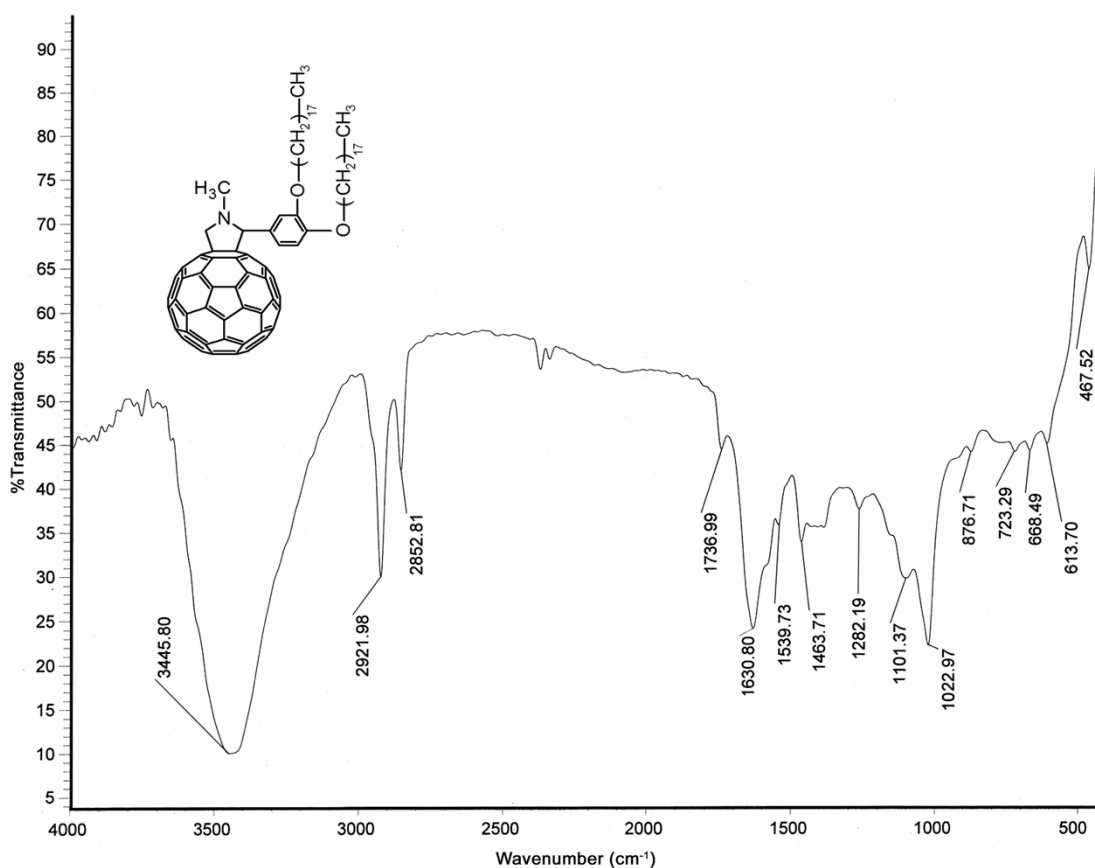

Fig. S28. FT-IR spectrum of 4c.

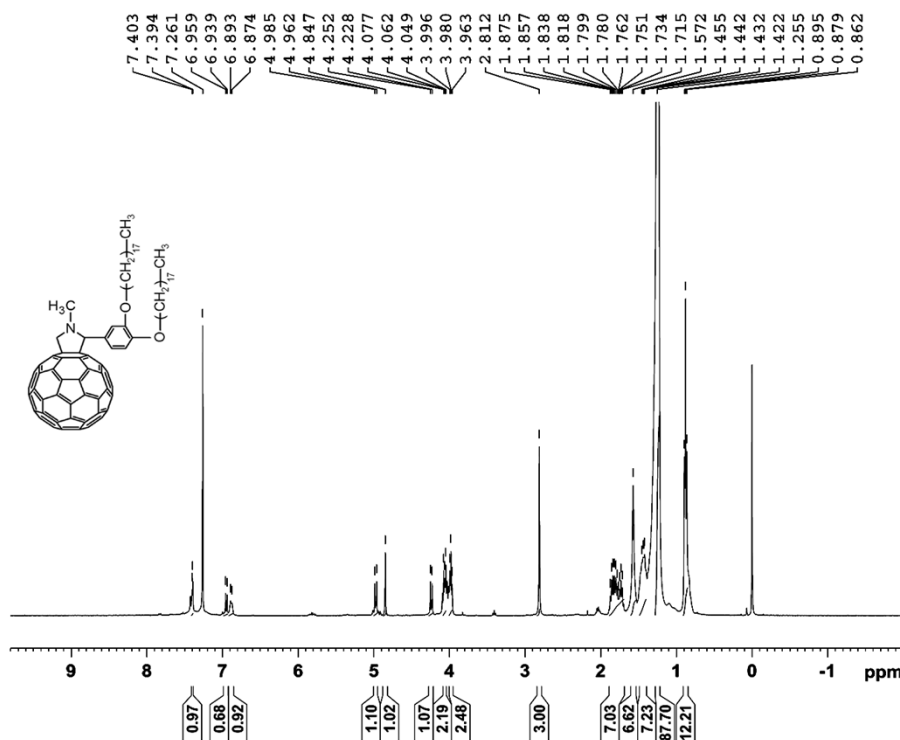

Fig. S29. <sup>1</sup>H NMR spectrum of 4c.

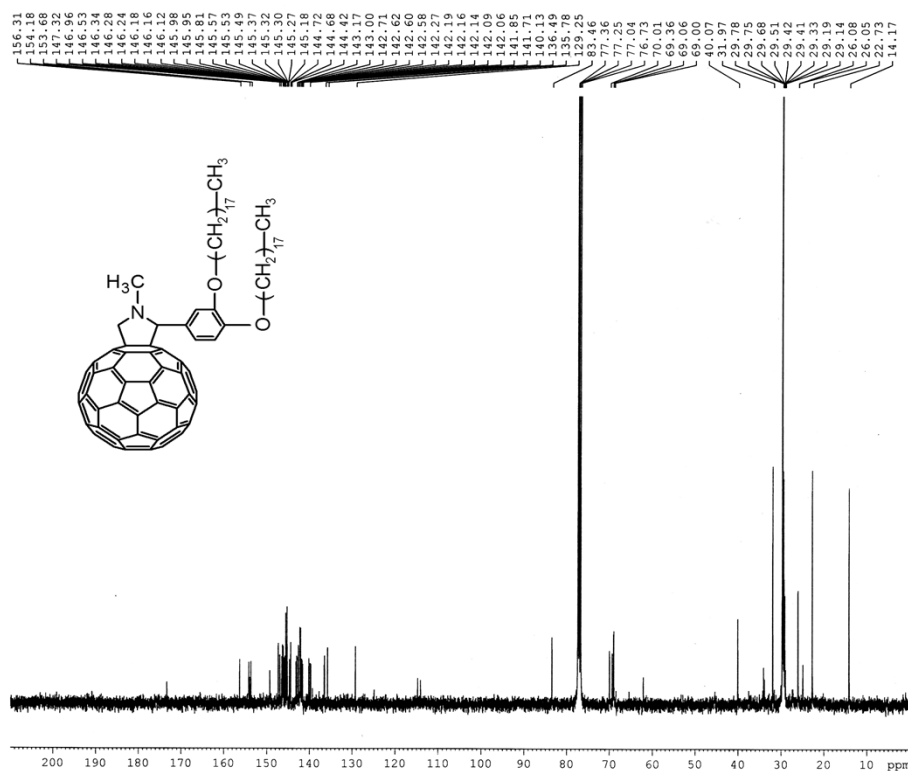

Fig. S30. <sup>13</sup>C NMR spectrum of 4c.

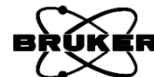

```

Current Data Parameters
NAME      bofp-4
EXPNO    1
PROCNO   1

F2 - Acquisition Parameters
Date_    20120606
Time     15.29
INSTRUM spect
PROBHD   5 mm PABBO BB-
PULPROG zg30
TD       65536
SOLVENT  CDC13
NS       25
DS       2
SWH      8223.685 Hz
FIDRES   0.125483 Hz
AQ       3.9846387 sec
RG       140.73
DW       60.800 usec
DE       6.50 usec
TE       296.6 K
D1       1.00000000 sec

===== CHANNEL f1 =====
NUC1     1H
P1       13.50 usec
PLW1    11.00000000 W
SFO1    400.1324710 MHz

F2 - Processing parameters
SI       65536
SF      400.1300171 MHz
WDW      EM
SSB      0
LB       0.30 Hz
GB       0
PC       1.00
    
```

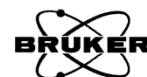

```

Current Data Parameters
NAME      bofp-5-new
EXPNO    1
PROCNO   1

F2 - Acquisition Parameters
Date_    20120629
Time     19.18
INSTRUM spect
PROBHD   5 mm PABBO BB-
PULPROG zgpg30
TD       65536
SOLVENT  CDC13
NS       3500
DS       4
SWH      24038.461 Hz
FIDRES   0.366798 Hz
AQ       1.3631988 sec
RG       195.62
DW       20.800 usec
DE       6.50 usec
TE       0 K
D1       2.00000000 sec
D11      0.03000000 sec

===== CHANNEL f1 =====
NUC1     13C
P1       8.25 usec
PLW1    55.40000153 W
SFO1    100.6228293 MHz

===== CHANNEL f2 =====
CPDPRG2 waltz16
NUC2     1H
PCPD2   90.00 usec
PLW2    11.00000000 W
PLW12   0.24750000 W
PLW13   0.20048000 W
SFO2    400.1316005 MHz

F2 - Processing parameters
SI       32768
SF      100.6127690 MHz
WDW      EM
SSB      0
LB       1.00 Hz
GB       0
PC       1.40
    
```

# Supporting Information

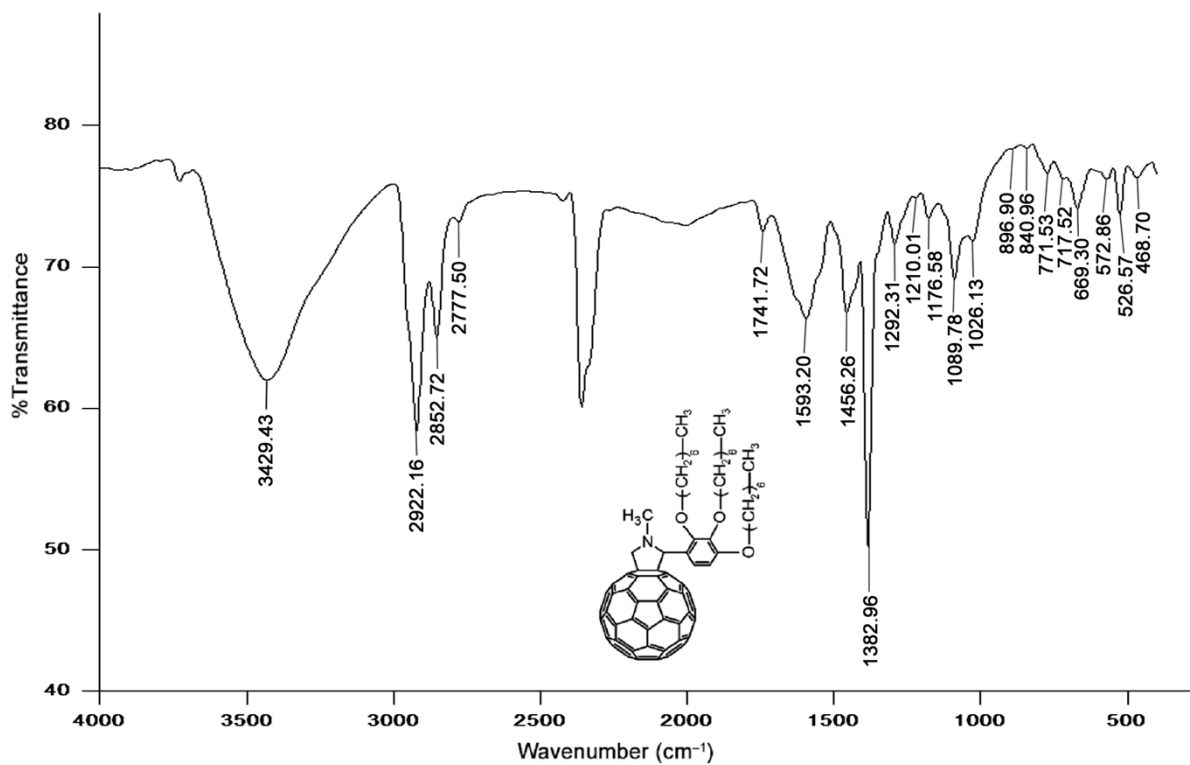

Fig. S31. FT-IR spectrum of 4d.

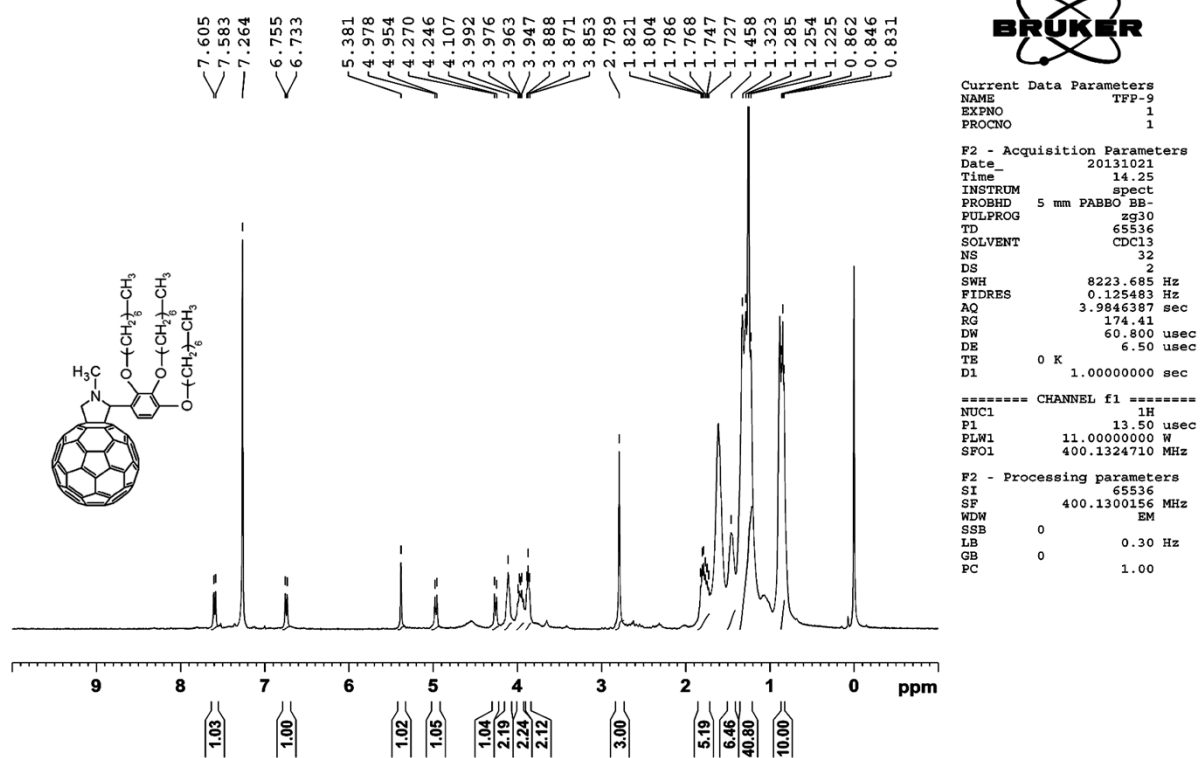

Fig. S32. <sup>1</sup>H NMR spectrum of 4d.

# Supporting Information

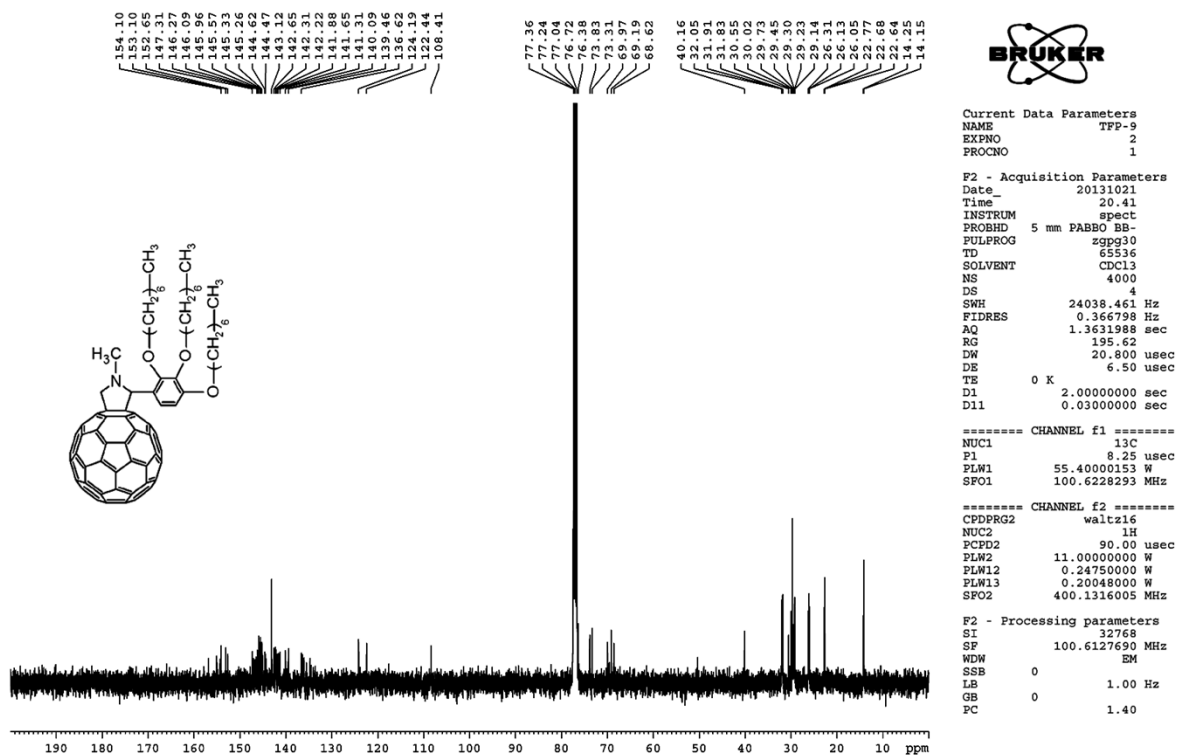

Fig. S33. <sup>13</sup>C NMR spectrum of 4d.

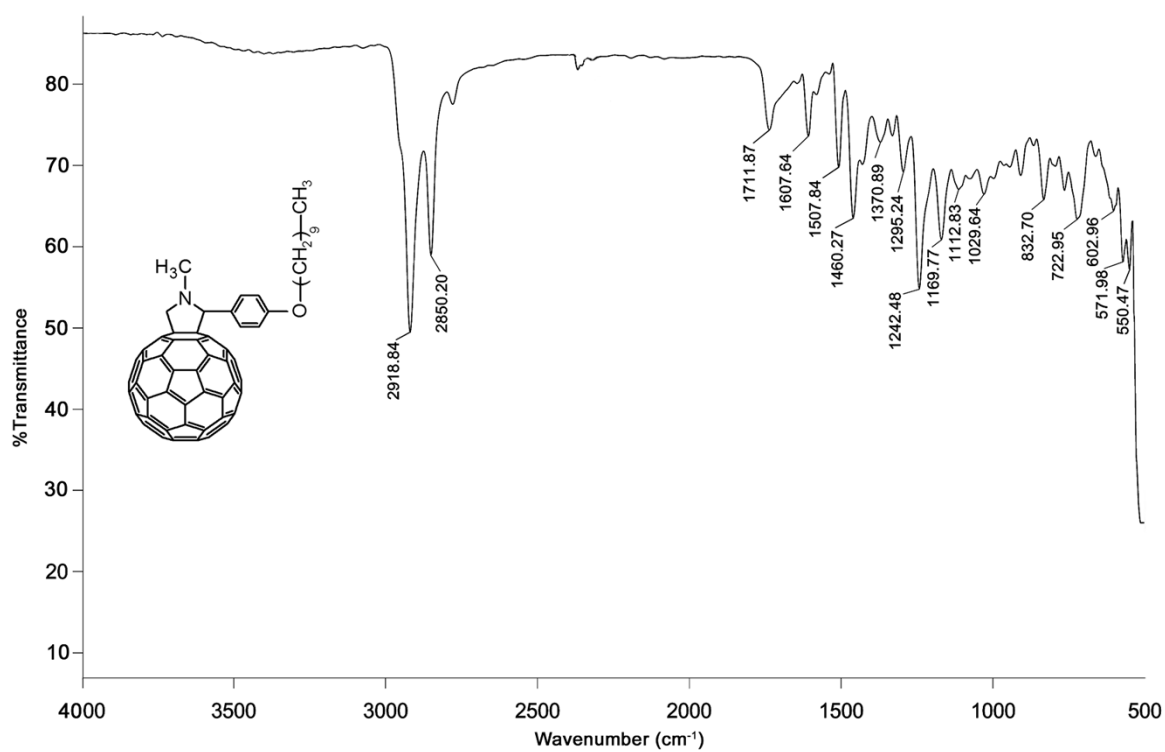

Fig. S34. FT-IR spectrum of 4e.

# Supporting Information

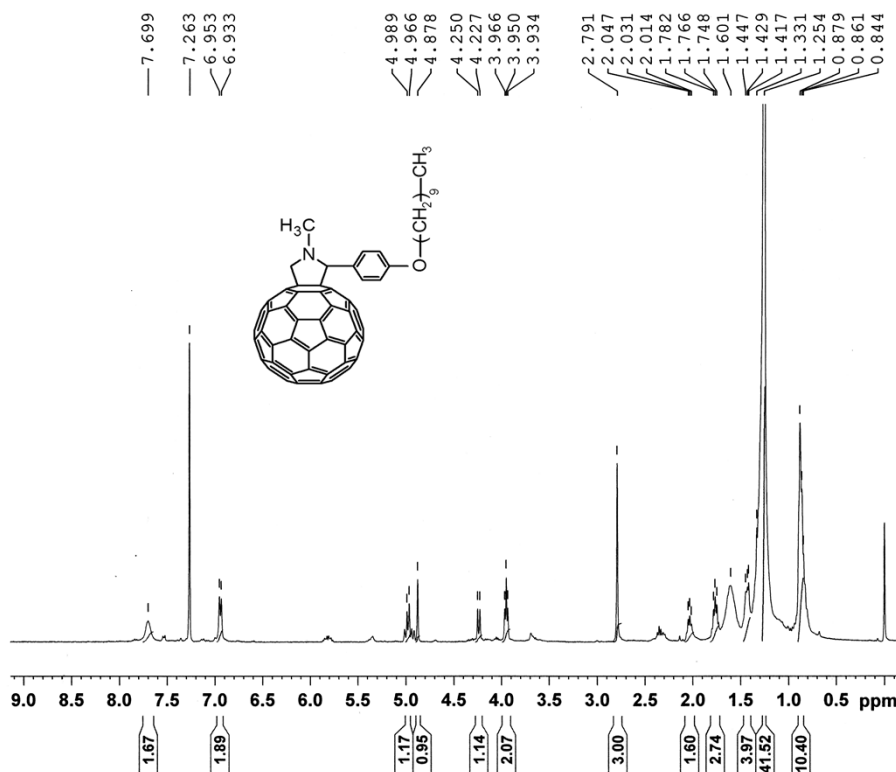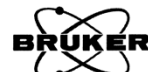

Current Data Parameters  
 NAME 4DFP  
 EXPNO 1  
 PROCNO 1

F2 - Acquisition Parameters  
 Date\_ 20121227  
 Time 11.49  
 INSTRUM spect  
 PROBHD 5 mm PABBO BB-  
 PULPROG zg30  
 TD 65536  
 SOLVENT CDCl3  
 NS 16  
 DS 2  
 SWH 8223.685 Hz  
 FIDRES 0.125483 Hz  
 AQ 3.9846387 sec  
 RG 174.41  
 DW 60.800 usec  
 DE 6.50 usec  
 TE 293.0 K  
 D1 1.00000000 sec

===== CHANNEL f1 =====  
 NUC1 1H  
 P1 13.50 usec  
 PLW1 11.00000000 W  
 SFO1 400.1324710 MHz

F2 - Processing parameters  
 SI 65536  
 SF 400.1300164 MHz  
 WDW EM  
 SSB 0  
 LB 0.30 Hz  
 GB 0  
 PC 1.00

Fig. S35. <sup>1</sup>H NMR spectrum of 4e.

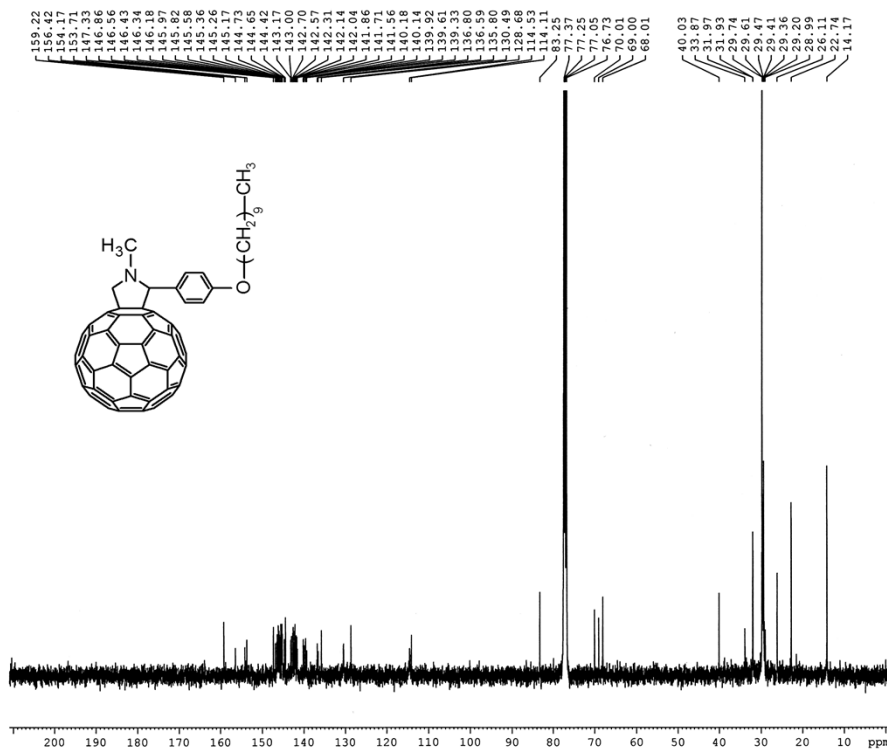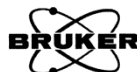

Current Data Parameters  
 NAME 4dfp  
 EXPNO 1  
 PROCNO 1

F2 - Acquisition Parameters  
 Date\_ 20130102  
 Time 21.00  
 INSTRUM spect  
 PROBHD 5 mm PABBO BB-  
 PULPROG zgpg30  
 TD 65536  
 SOLVENT CDCl3  
 NS 5000  
 DS 4  
 SWH 24038.461 Hz  
 FIDRES 0.366798 Hz  
 AQ 1.3631988 sec  
 RG 195.62  
 DW 20.800 usec  
 DE 6.50 usec  
 TE 293.4 K  
 D1 2.00000000 sec  
 D11 0.03000000 sec

===== CHANNEL f1 =====  
 NUC1 13C  
 P1 8.25 usec  
 PLW1 55.40000153 W  
 SFO1 100.6228293 MHz

===== CHANNEL f2 =====  
 CPDPRG2 waltz16  
 NUC2 1H  
 PCPD2 90.00 usec  
 PLW2 11.00000000 W  
 PLW12 0.24750000 W  
 FLM13 0.20048000 W  
 SFO2 400.1316005 MHz

F2 - Processing parameters  
 SI 32768  
 SF 100.6127690 MHz  
 WDW EM  
 SSB 0  
 LB 1.00 Hz  
 GB 0  
 PC 1.40

Fig. S36. <sup>13</sup>C NMR spectrum of 4e.



# Supporting Information

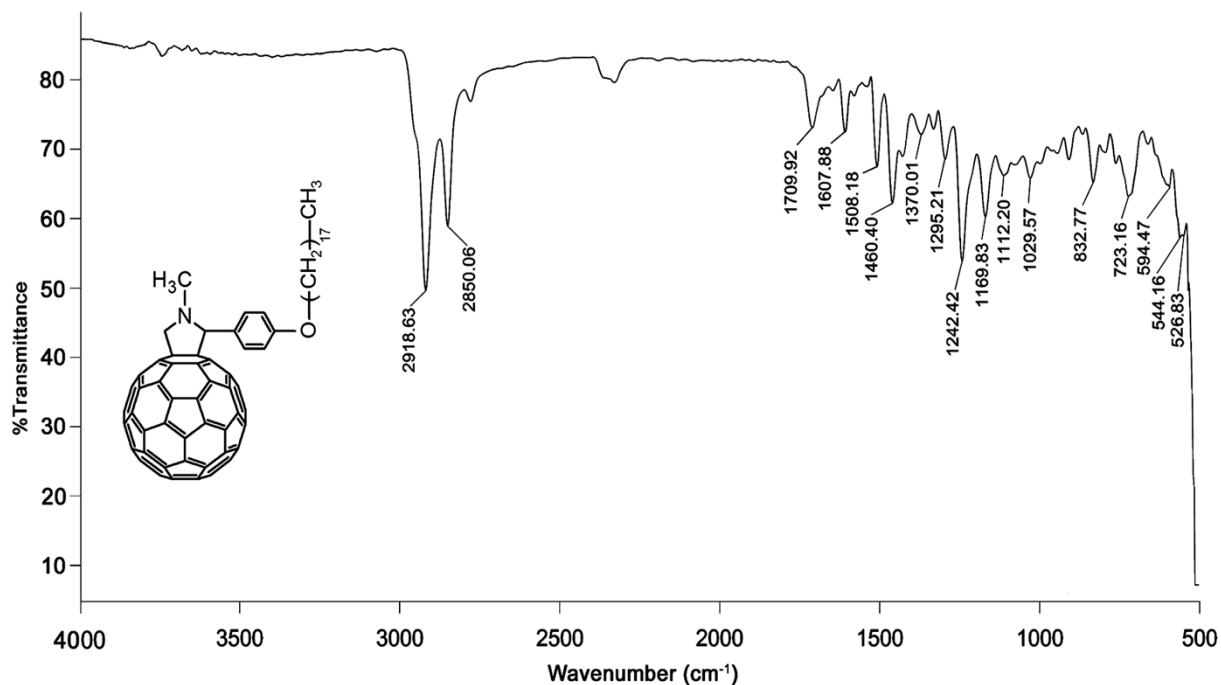

Fig. S37. FT-IR spectrum of 4f.

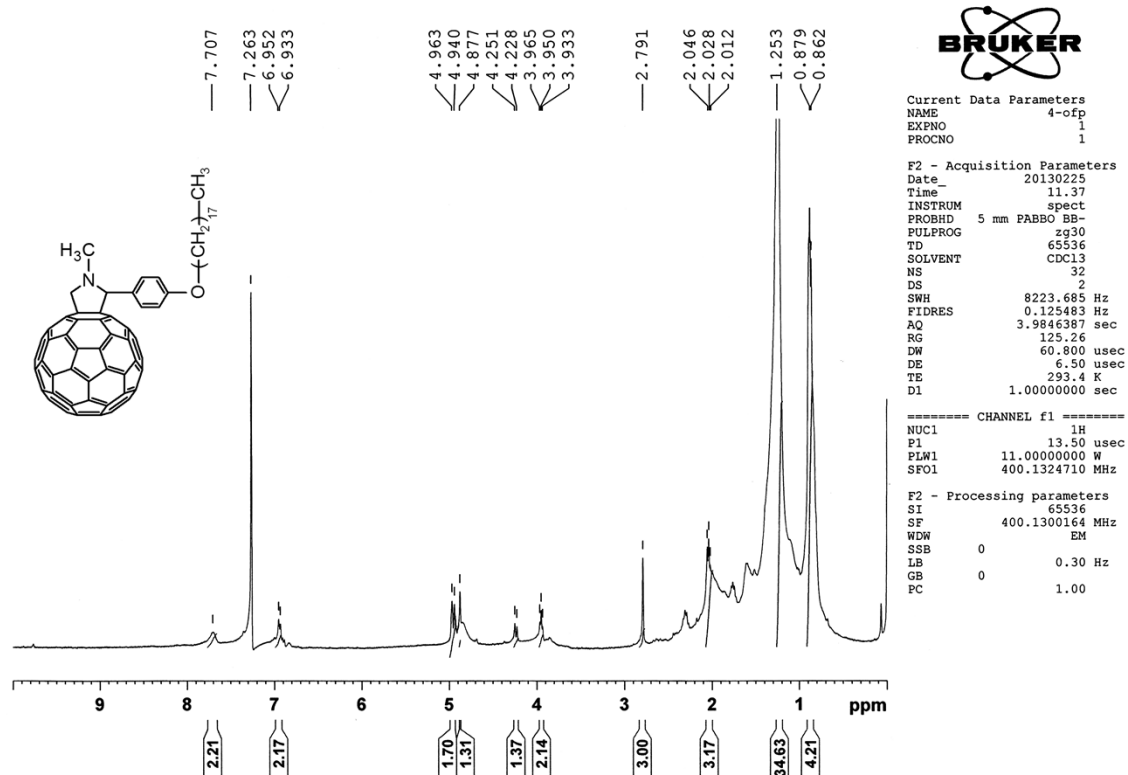

Fig. S38. <sup>1</sup>H NMR spectrum of 4f.

# Supporting Information

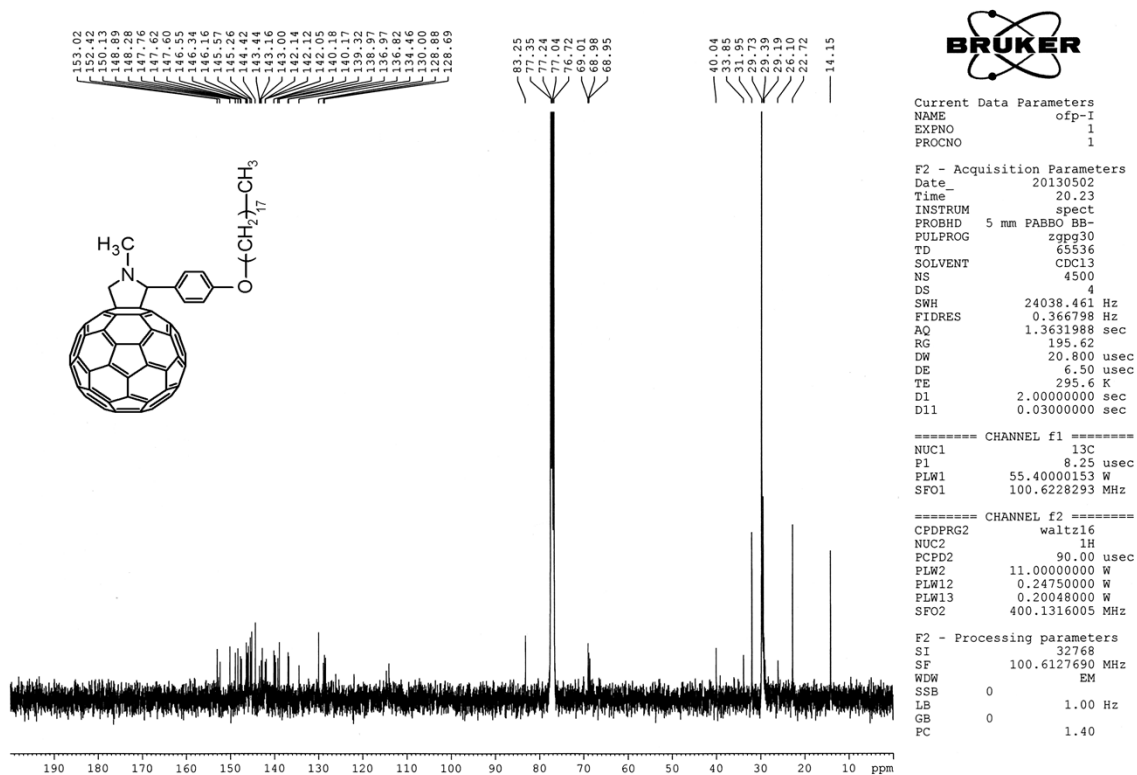

Fig. S39. <sup>13</sup>C NMR spectrum of 4f.

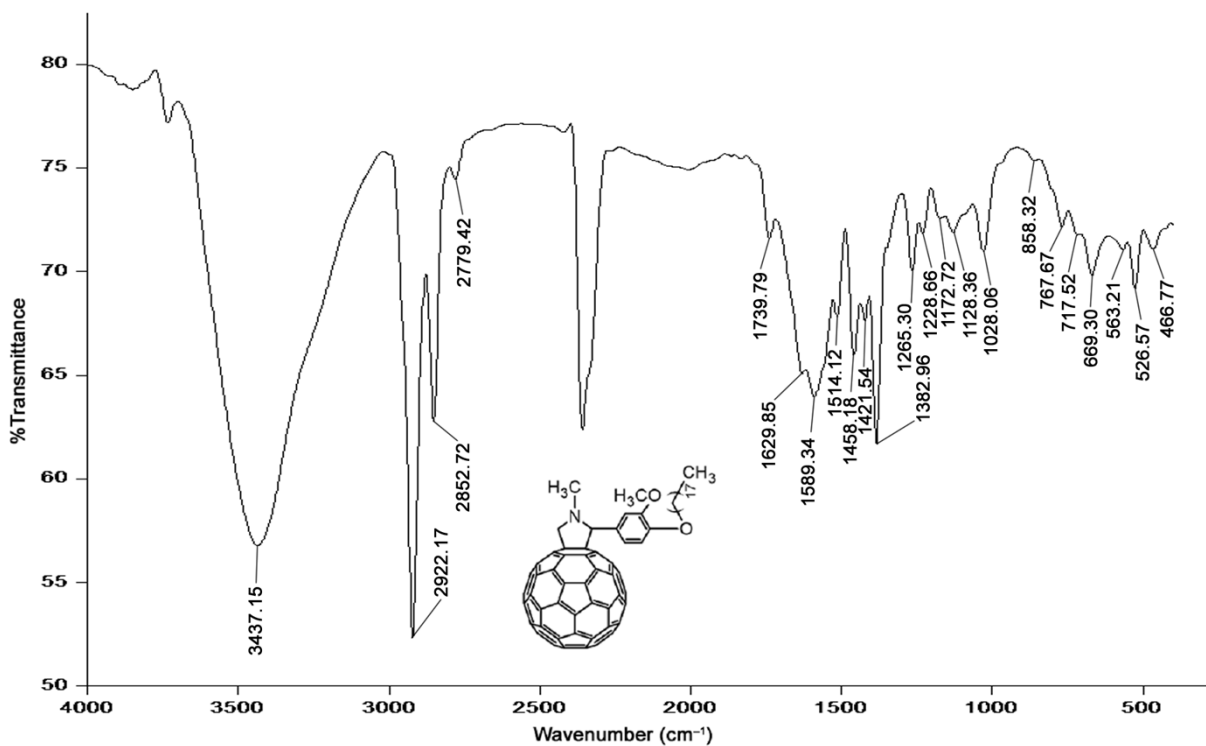

Fig. S40. FT-IR spectrum of 4g.

# Supporting Information

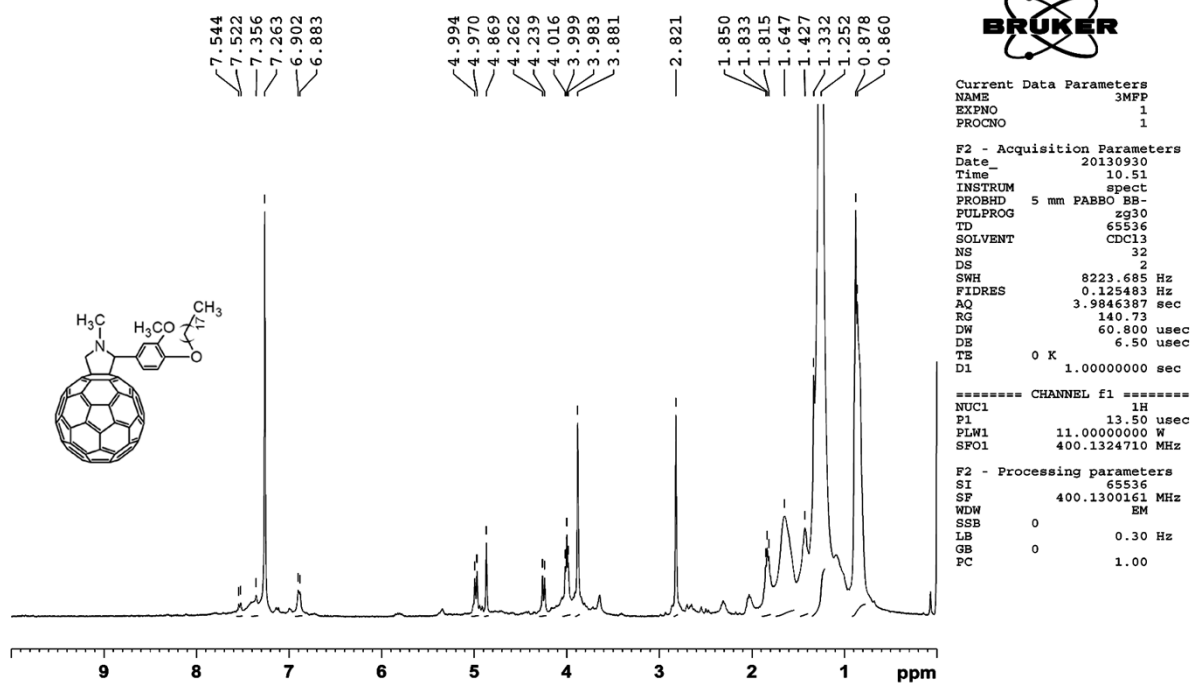

Fig. S41. <sup>1</sup>H NMR spectrum of 4g.

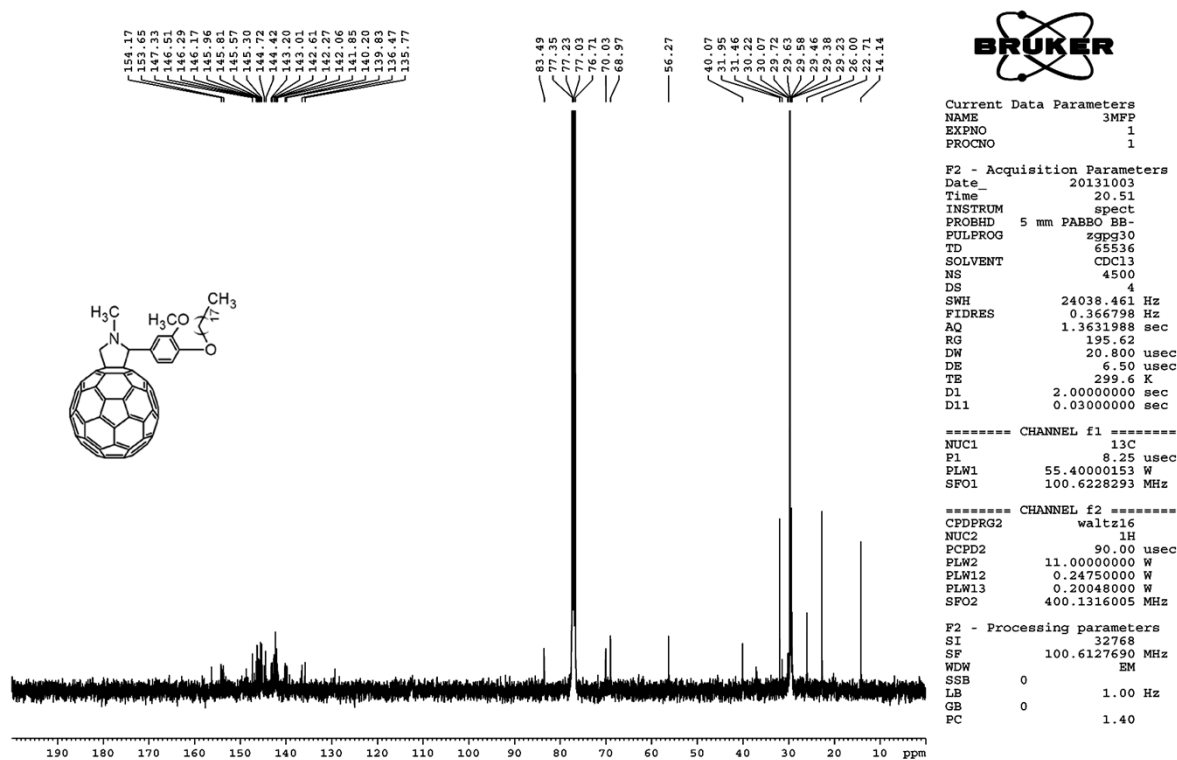

Fig. S42. <sup>13</sup>C NMR spectrum of 4g.

# Supporting Information

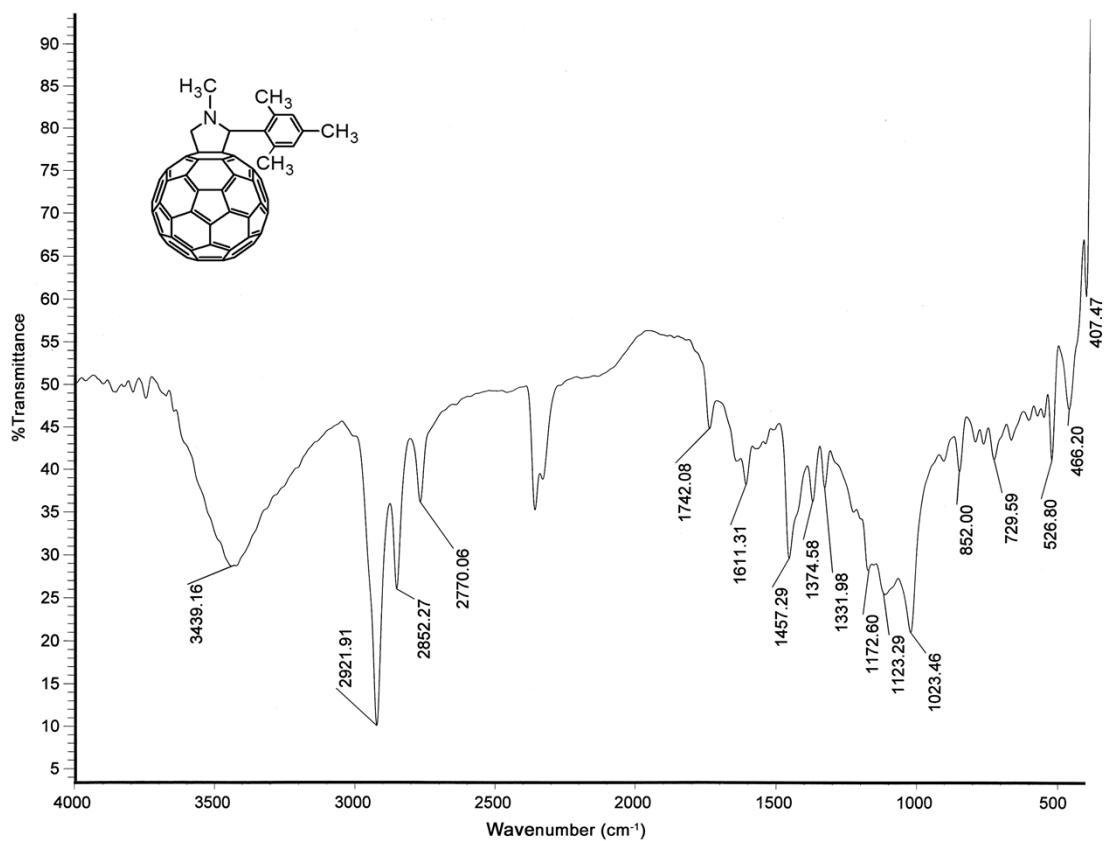

Fig. S43. FT-IR spectrum of 4h.

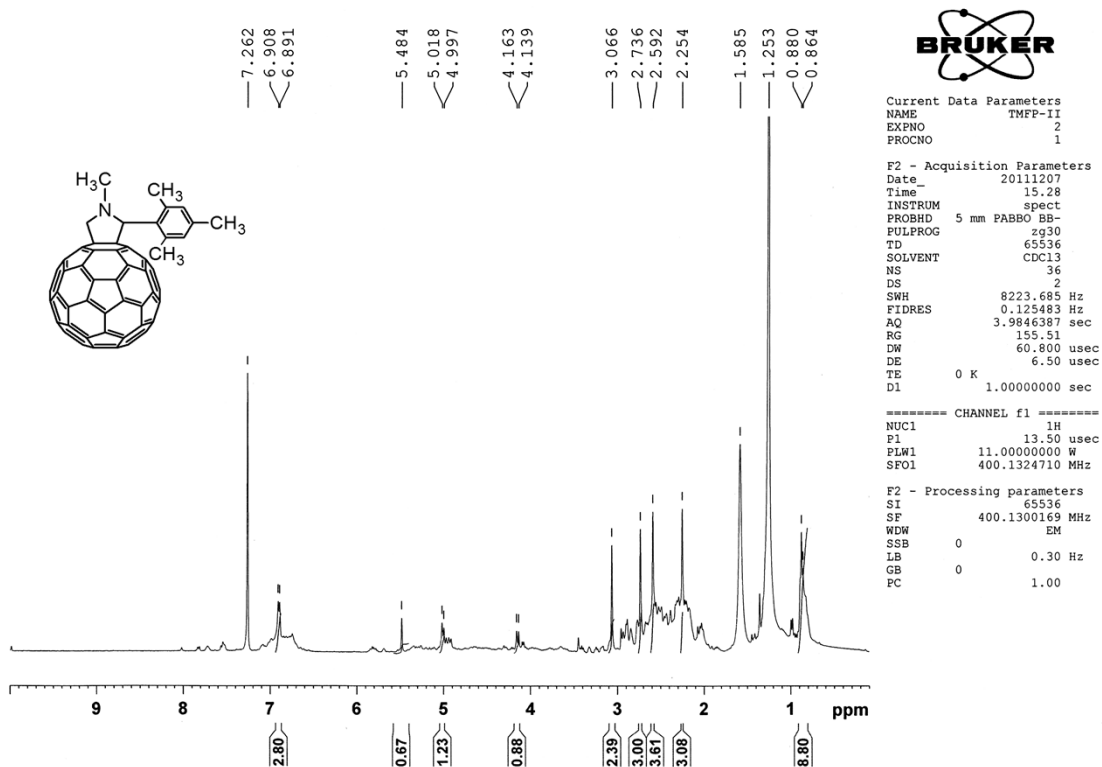

Fig. S44. <sup>1</sup>H NMR spectrum of 4h.

# Supporting Information

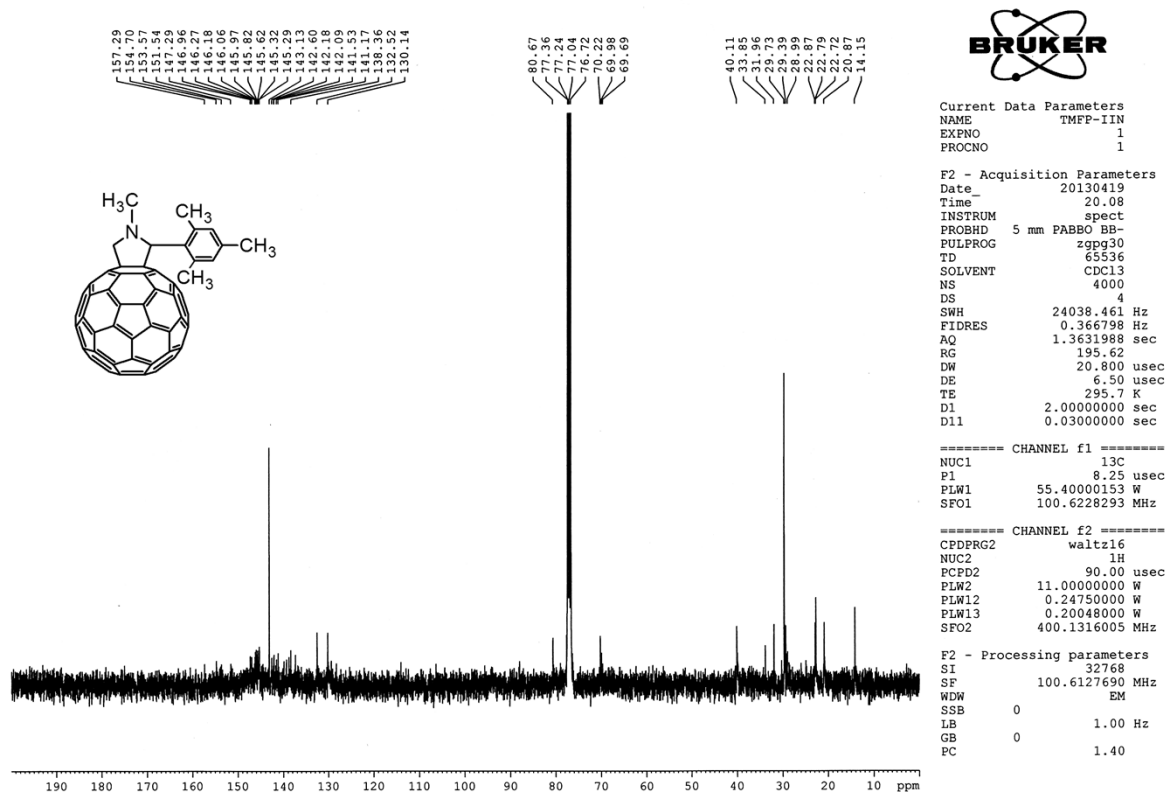

Fig. S45. <sup>13</sup>C NMR spectrum of 4h.

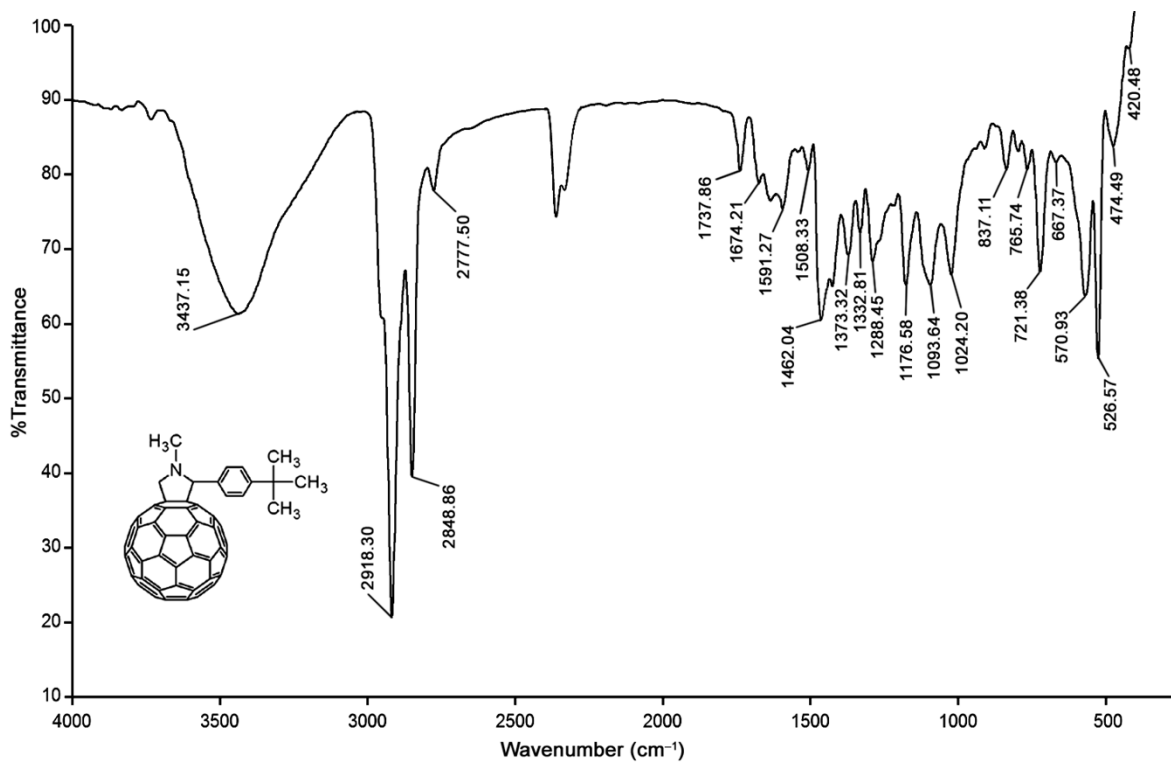

Fig. S46. FT-IR spectrum of 4i.

# Supporting Information

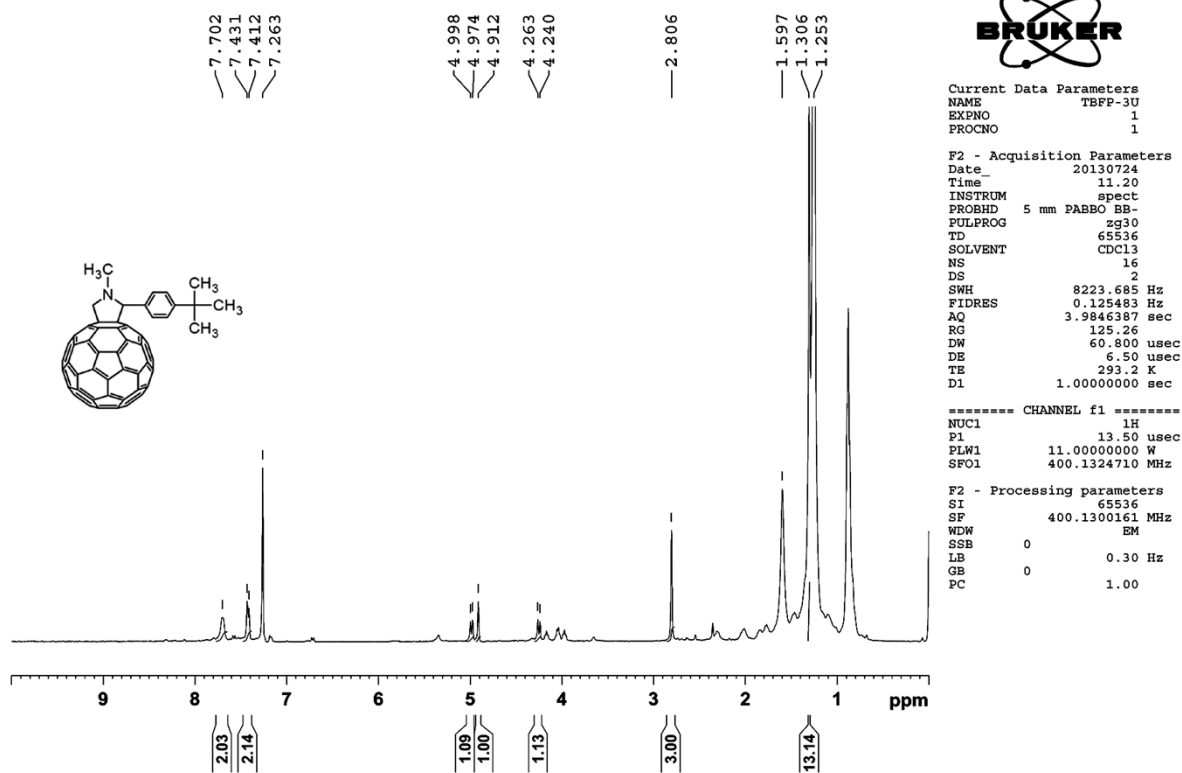

Fig. S47. <sup>1</sup>H NMR spectrum of 4i.

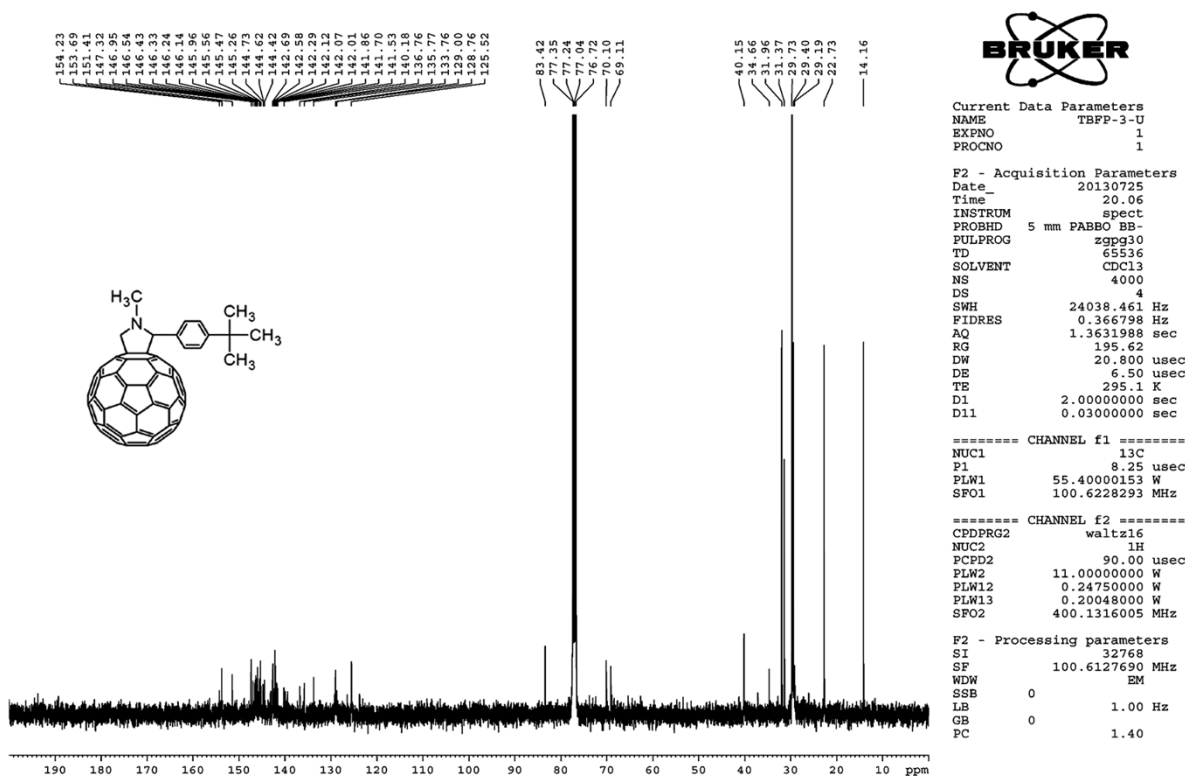

Fig. S48. <sup>13</sup>C NMR spectrum of 4i.

## Supporting Information

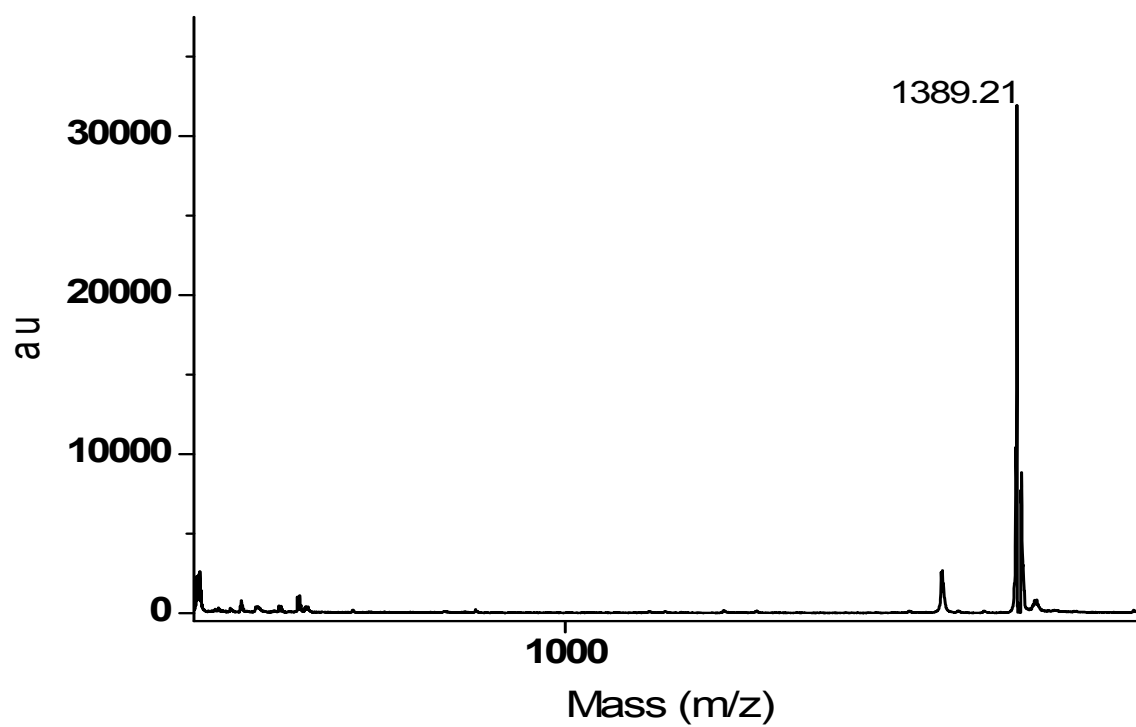

Fig. S49. MALDI-TOF mass spectrum of 4c.

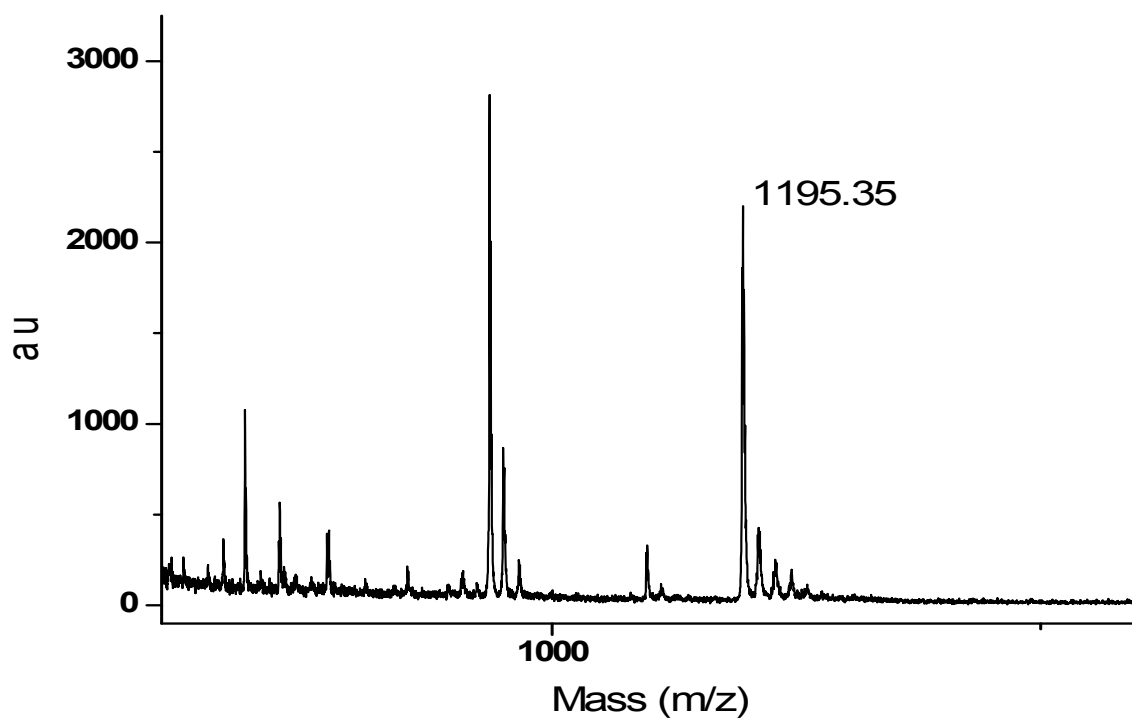

Fig. S50. MALDI-TOF mass spectrum of 4d.

## Supporting Information

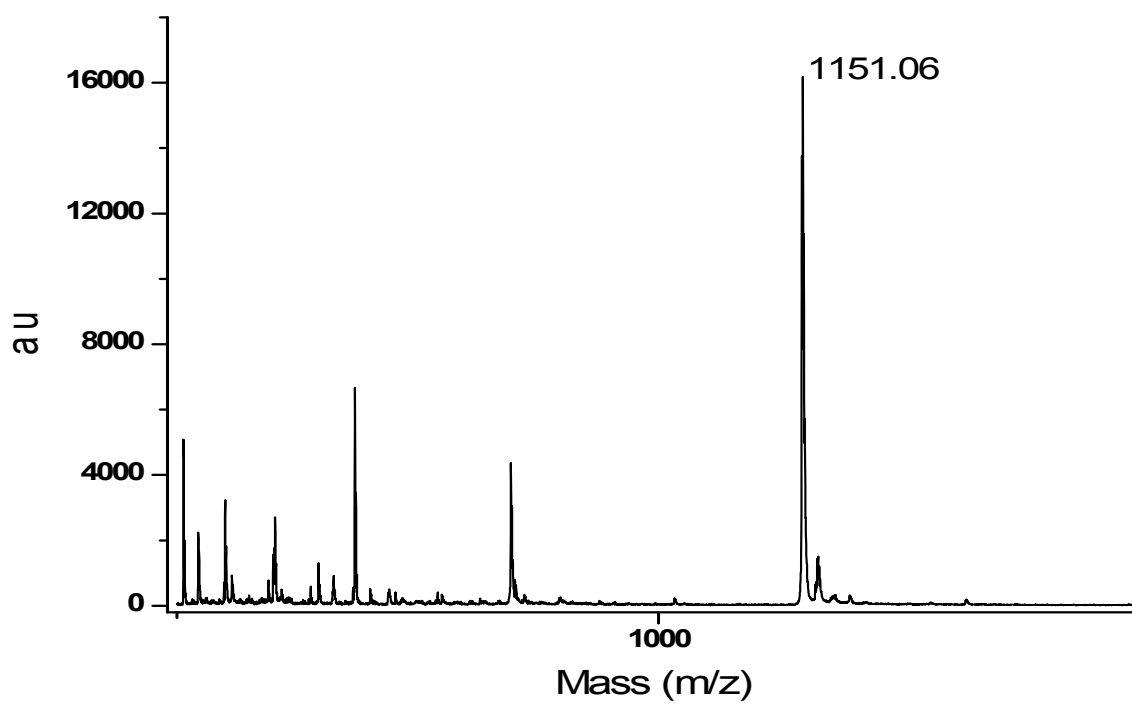

Fig. S51. MALDI-TOF mass spectrum of **4g**.

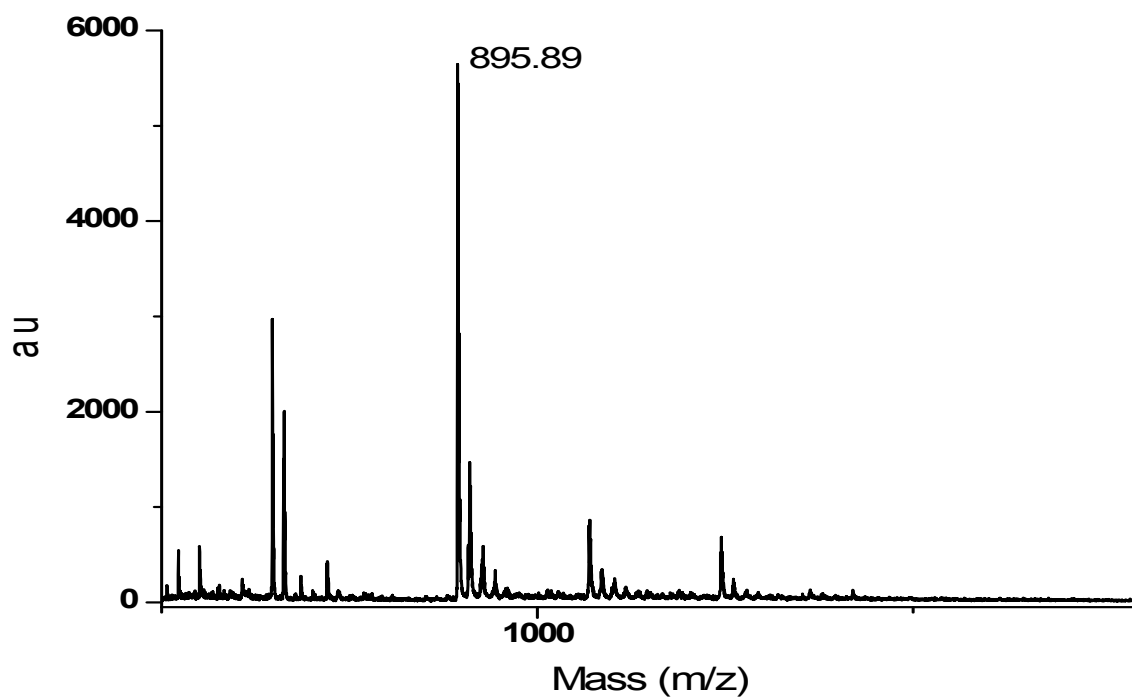

Fig. S52. MALDI-TOF mass spectrum of **4h**.
